1  
2  
3  
4  
5  
6  
7  
8  
9  
10  
11  
12  
13  
14  
15  
16  
17  
18  
19  
20  
21  
22  
23  
24  
25

**Ecdysone exerts biphasic control of regenerative signaling, coordinating the completion of regeneration with developmental progression**

**Running title:** Ecdysone regulates regeneration

Faith Karanja, Subhshri Sahu, Sara Weintraub, Rajan Bhandari, Rebecca Jaszczak, Jason Sitt, and Adrian Halme\*

**Keywords:** Ecdysone, Regeneration Checkpoint, Broad, Wingless, Dilp8

Department of Cell Biology  
University of Virginia School of Medicine  
Charlottesville, VA 22902

\* Corresponding Author: [ajh6a@virginia.edu](mailto:ajh6a@virginia.edu)

26 **Summary Statement**

27 Ecdysone coordinates regenerative activity with developmental progression through the  
28 biphasic, concentration-dependent activation, and suppression of regenerative  
29 signaling.

30

31

32 **Abstract**

33

34 In *Drosophila melanogaster*, loss of regenerative capacity in wing imaginal discs  
35 coincides with an increase in systemic levels of the steroid hormone ecdysone, a key  
36 coordinator of their developmental progression. Regenerating discs release the relaxin  
37 hormone Dilp8, which limits ecdysone synthesis and extends the regenerative period.  
38 Here, we describe how regenerating tissues produce a biphasic response to ecdysone  
39 levels: lower concentrations of ecdysone promote local and systemic regenerative  
40 signaling, whereas higher concentrations suppress regeneration through the expression  
41 of *broad* splice isoforms. Ecdysone also promotes the expression of *wingless* during both  
42 regeneration and normal development through a distinct regulatory pathway. This dual  
43 role for ecdysone explains how regeneration can still be completed successfully in *dilp8*  
44 mutant larvae: higher ecdysone levels increase the regenerative activity of tissues,  
45 allowing regeneration to reach completion in a shorter time. From these observations, we  
46 propose that ecdysone hormone signaling functions to coordinate regeneration with  
47 developmental progression.

48

## 49 **Introduction**

50

51 As tissues develop, their capacity to regenerate is often diminished (Seifert & Voss,  
52 2013; Yun, 2015). In many cases, loss of regenerative capacity is developmentally  
53 regulated and coincides with changes in systemic hormone signaling. For example, loss  
54 of regenerative capacity in the heart tissues of both *Xenopus laevis* and mice is preceded  
55 by a sharp increase in systemic thyroid hormone levels (Hirose et al., 2019; Marshall et  
56 al., 2019). Similarly, *Drosophila melanogaster* imaginal discs (the larval precursors to  
57 adult tissues) lose the ability to regenerate near the end of larval development (Halme et  
58 al., 2010), coinciding with an increase in systemic levels of the steroid hormone ecdysone,  
59 a key coordinator of *Drosophila* developmental progression (Burdette, 1962; Yamanaka  
60 et al., 2013). Although thyroid hormone in vertebrates and ecdysone in *Drosophila* have  
61 also been associated with loss of regenerative capacity, both hormones are present at  
62 lower levels during the regeneration-competent periods of development (Hirose et al.,  
63 2019; Hodgetts et al., 1977; Lavrynenko et al., 2015; Marshall et al., 2019). The regulation  
64 of systemic levels of ecdysone is a crucial part of the *Drosophila* regenerative response.  
65 Regenerating imaginal discs synthesize and release the relaxin hormone *Drosophila*  
66 insulin-like peptide 8 (Dilp8), which signals to the brain and endocrine organs through its  
67 receptor Lgr3 to limit the synthesis of the steroid hormone ecdysone (Colombani et al.,  
68 2012, 2015; Garelli et al., 2012, 2015; Jaszczak et al., 2016; Vallejo et al., 2015). Reduced  
69 ecdysone production extends the larval developmental period, providing damaged  
70 imaginal discs additional time to regenerate (Halme et al., 2010). However, it is unclear  
71 whether low levels of ecdysone still can influence regenerative activity.

72 To better understand how ecdysone regulates regeneration, we examined how  
73 manipulating ecdysone signaling affects both systemic and local regenerative pathways  
74 in the *Drosophila* wing imaginal disc. Here we demonstrate that while ecdysone signaling  
75 is limited during regeneration, it remains necessary for the regenerative response. We  
76 show that ecdysone signaling limits regeneration at the end of larval development through  
77 the expression of specific splice isoforms of the BTB-POZ transcription factor Broad,  
78 which inhibit the regenerative expression of Wingless (Wg). However, we also establish  
79 that ecdysone signaling is essential for regenerative activity and Wg expression in the

80 disc. Regenerating discs exhibit a positive response in signaling activity to increasing  
81 ecdysone levels promoting Wg expression through a Broad-independent pathway. This  
82 dual role for ecdysone in promoting and limiting regeneration helps explain how *dilp8*  
83 mutant larvae, which lack the regenerative checkpoint and thus produce minimal  
84 developmental delay following damage, can still regenerate their wing discs during the  
85 shorter regenerative period. Therefore, ecdysone's biphasic regulation of regenerative  
86 activity gives *Drosophila* larvae the ability to coordinate the completion of regeneration  
87 with the end of the larval period.

88

## 89 **Results**

### 90 Ecdysone limits regenerative repair of wing imaginal discs

91 To examine how ecdysone signaling regulates regenerative activity, we measured  
92 how developmental timing and changes in ecdysone titer regulate regenerative outcomes  
93 following X-irradiation damage to wing imaginal discs. *Drosophila* larvae exposed to X-  
94 irradiation during early 3<sup>rd</sup> larval instar (80h AED @ 25°C) can regenerate their wing  
95 tissues almost entirely, with only a few adult wings from irradiated larvae exhibiting minor  
96 defects (Fig. 1A, B, Fig S1A). The regenerated adult wings are also a similar size to those  
97 produced by undamaged control larvae (Fig. 1C). In contrast, larvae irradiated at a later,  
98 pre-pupal stage (late 3<sup>rd</sup> larval instar – 104h AED @ 25°C) produced adult wings that  
99 exhibit a greater frequency of malformations in the wing veins and margin (Fig. 1A, B)  
100 and fail to reach the size of normal undamaged wings (Fig. 1C). These differences in  
101 regenerative capacity are also correlated with the ability to activate the regenerative  
102 checkpoint. Irradiation of larvae at 80h AED produces a robust checkpoint activation and  
103 developmental delay, whereas irradiation at 104h AED fails to activate the regeneration  
104 checkpoint, producing no extension of the larval period (Fig 1D). These results are  
105 consistent with previous observations that identified this developmental transition as a  
106 regeneration restriction point (RRP), a developmental period when damage no longer  
107 activates the regenerative checkpoint and tissues lose their regenerative capacity (Halme  
108 et al., 2010; Smith-Bolton et al., 2009). To examine how transition through the RRP  
109 impacts regenerative signaling in damaged wing discs, we measured the damage-  
110 induced expression of *dilp8*. Dilp8 is a critical regulator of the systemic response to

111 regeneration, an effector of the regeneration checkpoint, and a valuable marker for  
112 regenerative activity in damaged tissues. Consistent with the reduced regenerative  
113 activity we observed as larvae pass through the RRP, we observe reduced activation of  
114 *dilp8* expression (*Dilp8::GFP*) in wing discs damaged at progressively later times in larval  
115 development (Fig. 1E and S1B, C).

116 To further examine whether regenerative signaling in damaged discs is limited as  
117 larvae pass through the RRP, we also examined the irradiation-induced expression of the  
118 critical regenerative morphogen, Wingless (*Wg*). *Wg* is upregulated in the regeneration  
119 blastema in damaged wing discs and is necessary for regeneration (Smith-Bolton et al.,  
120 2009). *Wg* expression in the hinge region surrounding the wing pouch is critical to the  
121 radiation-resistant cells in this region that contribute to the X-irradiation regenerative  
122 response (Verghese & Su, 2016). When we examine *Wg* expression in the dorsal hinge  
123 of irradiated larvae, we find that early irradiation (80h AED) produces a significant  
124 increase in *Wg* expression, which is no longer observed as larvae transit the RRP (Fig.  
125 1F, S1D, E). These results demonstrate that the loss of regenerative activity seen as  
126 larvae transit the RRP is accompanied by a failure to activate the regenerative checkpoint  
127 and the inability to activate the expression of *Dilp8* and *Wg*, key mediators of systemic  
128 and local regenerative processes.

129 As larvae approach the larval/pupal transition, circulating levels of ecdysone  
130 increase rapidly and promote the exit from the larval period (Lavrynenko et al., 2015;  
131 Rewitz et al., 2013). To determine whether increased ecdysone titer is sufficient to limit  
132 regenerative activity in wing discs, ecdysone levels were increased in larvae ectopically  
133 by feeding larva food containing 20-hydroxyecdysone (20HE), an active form of this  
134 steroid hormone. Larvae damaged before the RRP (80h AED) and fed 0.3 mg/ml 20HE  
135 no longer completely regenerate their imaginal discs (Fig. S2A,B) but instead produce  
136 malformed (Fig. S2C) and smaller (Fig.S2D) adult wings. Furthermore, feeding low levels  
137 of 20HE (0.1mg/ml) to larvae irradiated after the RRP (104h AED) produces a synergistic  
138 increase in adult wing malformations (Fig. S2E,F,G) and suppression of regenerative  
139 growth (Fig. S2H). Together these observations support a model that the increasing levels  
140 of systemic ecdysone signaling at the end of larval development suppress regenerative  
141 signaling and growth in wing imaginal discs.

142

143 Ecdysone signaling in the wing disc is necessary for both the suppression and activation  
144 of regenerative signals

145 Although the 20HE feeding experiments above demonstrate that increasing  
146 systemic ecdysone limits the regeneration observed in adult wing tissues, it remained  
147 unclear whether ecdysone signaling acts directly on regenerating tissues to suppress  
148 regenerative activity or indirectly through other tissues. To test the tissue-autonomous  
149 requirement for ecdysone signaling in regenerating wing discs, we expressed a dominant-  
150 negative allele of the ecdysone receptor (Cherbas et al., 2003) in the dorsal compartment  
151 of the wing pouch using *Beadex*-driven, Gal4-UAS expression (*Bx>EcR.A<sup>DN</sup>*, Fig. S3A).  
152 After larvae transition through the RRP (104h AED), regeneration-induced expression of  
153 the Dilp8 checkpoint signal is limited (Fig. 1G,I, S3B), reflecting the reduced regenerative  
154 activity in these tissues. However, we see that targeted inhibition of ecdysone signaling  
155 in the dorsal wing pouch significantly increases *dilp8* expression in larvae damaged at  
156 104h AED (Fig. 1H,I, S3B), suggesting that the regenerative Dilp8 expression in these  
157 post-RRP tissues is limited by ecdysone signaling.

158 To further examine whether regenerative signaling is increased in damaged post-  
159 RRP wing discs when we limit ecdysone signaling, we also examined the damage-  
160 induced expression of Wg at the dorsal hinge region of the wing pouch (Fig. S3A). Prior  
161 to the RRP, when discs are competent to regenerate, we observe that damage induces  
162 an increase in Wg expression at the dorsal hinge (Fig. 1F, S1D,E). Inhibition of ecdysone  
163 signaling in the dorsal pouch leads to an overall decrease in Wg expression at the hinge  
164 in undamaged tissues (Fig. 1G, S3C), an observation we address more specifically later  
165 in this study. However, in contrast to control discs, where no significant increase in Wg  
166 expression is seen in the dorsal hinge of discs damaged after the RRP (104h AED), we  
167 see that limiting ecdysone signaling in the wing discs now permits a damage-induced  
168 increase in dorsal hinge Wg expression in post-RRP wing discs. This increase in Wg  
169 expression is similar to what we see in regeneration competent discs pre-RRP (Fig. 1H,  
170 J, S3C). These data demonstrate that at the end of larval development, ecdysone  
171 signaling acts tissue-autonomously in wing discs to suppress critical local (Wg

172 upregulation at the hinge) and systemic (*dilp8* expression) signaling events associated  
173 with regeneration.

174         Since circulating ecdysone is present at lower levels at earlier stages of larval  
175 development when the wing discs can regenerate (Lavrynenko et al., 2015), we wanted  
176 to determine whether ecdysone regulates regeneration signaling in wing discs damaged  
177 at 80h AED, before the RRP. To assess this, we X-irradiated control and *Bx>EcR.A<sup>DN</sup>*  
178 larvae early in the third larval instar (80h AED), when regenerative activity is high.  
179 Unexpectedly, we observe that ecdysone signaling is necessary for the activation of  
180 regenerative signaling pathways following early damage. There is a clear inhibition of  
181 *dilp8* expression in the regenerating dorsal wing of *Bx>EcR.A<sup>DN</sup>* larvae compared to the  
182 controls (Fig. 1K, L, M, S3D). Ecdysone signaling is also necessary for the increased  
183 expression of Wg in the dorsal hinge following damage as we observed reduced  
184 expression of Wg at the dorsal hinge of *Bx>EcR.A<sup>DN</sup>* expressing tissue compared with  
185 controls [Fig. 1K,L,N, S3E]. This requirement of ecdysone signaling in the activation of  
186 regenerative activity is also seen following targeted expression of the *Drosophila* TNF $\alpha$   
187 homolog, *eiger* (*Bx>egr*). Overexpression of *eiger* in wing discs produces localized  
188 damage and elicits a strong induction of Wg and Dilp8 expression in the regeneration  
189 blastema ((Smith-Bolton et al., 2009), Fig. S3F). We see that expression of *EcR.A<sup>DN</sup>*  
190 decreases *eiger*-induced Wg and Dilp8 expression in the damage blastema formed in the  
191 dorsal compartment of the wing pouch (Fig. S3F-H).

192         Together, these findings suggest a dual (activation and suppression) role for  
193 ecdysone signaling in the regulation of regenerative activity. During regenerative  
194 competence, ecdysone signaling in the damaged disc is required to activate Wg and Dilp8  
195 expression, two critical signaling events that coordinate the local and systemic  
196 regenerative responses, respectively. Following development past the RRP, when the  
197 imaginal discs lose their regenerative capacity, ecdysone signaling in the disc is required  
198 to suppress the activation of these regenerative pathways.

199

200 Ecdysone regulates regenerative signaling in a biphasic, concentration-dependent  
201 manner

202           During the last larval instar, pulses of ecdysone synthesis increase the systemic  
203 levels of circulating ecdysteroids in the larvae before a final surge of ecdysone synthesis  
204 at the end of larval development activates pupariation pathways and initiate  
205 metamorphosis (Lavrynenko et al., 2015). Based on this, we hypothesized that the dual  
206 activities of ecdysone signaling that we had observed, being necessary for activation of  
207 regenerative pathways during regenerative competence and suppressing regenerative  
208 pathways following development past the RRP, could reflect the different ecdysone levels  
209 at these two points of development. Lower circulating concentrations of ecdysone, such  
210 as those found pre-RRP, are necessary for activation of regenerative activity, whereas  
211 the higher levels of ecdysone circulating during the pre-pupal surge interfere with the  
212 activation of regeneration pathways. To test this hypothesis, we manipulated circulating  
213 20HE levels in larvae by supplementing their food with increasing concentrations of 20HE  
214 following X-irradiation damage at 80h AED. We then measured the regenerative  
215 activation Wg and Dilp8 expression in wing discs 12 hours after X-irradiation (Fig. 2A).

216           We find that feeding larvae ecdysone generally promotes activation of  
217 regeneration genes following X-irradiation damage. At all concentrations of 20HE feeding,  
218 we observe an increase in Dilp8 and Wg expression in damaged wing discs compared  
219 with control larvae with no 20HE supplement in their food (Fig. 2B-F, G, H S4A, B). We  
220 also observe that 20HE feeding increased the size of the regenerating tissue (Fig. 2I,  
221 S4C). However, the effect of ecdysone feeding was maximized at 0.3 mg/ml 20HE  
222 concentration. Higher concentrations of ecdysone (0.6 or 1.0 mg/ml) produce a  
223 substantial reduction in Dilp8 and Wg expression (Fig. 2B-F, G, H S4A, B) and produce  
224 no additional increase in growth (Fig. 2I, S4C). Therefore, 20HE feeding produces a  
225 biphasic regenerative signaling response in irradiated tissues. In contrast, the biphasic  
226 effect of increasing 20HE concentrations through feeding is not seen when we examine  
227 *eiger*-induced Dilp8 and Wg expression, with both showing a modest but not statistically  
228 significant increase in expression with increasing ecdysone levels (Fig S4D-F). The  
229 differences in ecdysone sensitivity from X-irradiated tissues may reflect the persistence  
230 and the intensity of the damage produced in the *Bx>eiger* tissues, which likely maximizes  
231 regenerative signaling.

232



233 Broad splice isoforms are necessary to block regenerative signaling after the RRP

234 To determine how ecdysone limits regenerative signaling, we examined the  
235 expression of one of the downstream targets of ecdysone signaling, the BTB-POZ family  
236 transcription factor, Broad. Broad is one of the earliest targets of the pre-pupal ecdysone  
237 pulse. Splice isoforms of the transcription factor *broad* – (*brZ1*, *Z2*, *Z3*, and *Z4*), named  
238 after their respective zinc finger domains ((Bayer et al., 1996; DiBello et al., 1991; Kiss et  
239 al., 1988); Fig. S5A), determine the tissue-specific signaling events that are initiated in  
240 response to ecdysone (Emery et al., 1994; Von Kalm et al., 1994). BrZ1 has also been  
241 recently shown to antagonize Chinmo expression in the wing disc, limiting regenerative  
242 activity (Narbonne-Reveau & Maurange, 2019). Using western-blotting of wing disc-  
243 derived lysates (WB, Fig. 3A) and immunofluorescence with Broad-targeting antibodies  
244 (IF, Fig. S5B), we visualized the spatial and temporal distribution of Broad expression  
245 during normal wing development. Broad splice isoforms are expressed in all imaginal disc  
246 cells throughout the final instar of larval development. Based on their distinct molecular  
247 sizes (Emery et al., 1994), we determined that BrZ2 is expressed throughout the third  
248 larval instar, but its levels increase as the larvae approach pupation. While we could not  
249 distinguish BrZ1 and BrZ3 based on size, previous studies have demonstrated that the  
250 BrZ3 splice isoform is not expressed in imaginal discs (Emery et al., 1994). The  
251 expression of both BrZ1 and BrZ4 can be detected at 104hAED and dramatically increase  
252 as the larvae approach pupariation. We could verify the emergence of BrZ1 expression  
253 in the tissue using Z1-targeted IF (Fig. S5B'). Following early damage (2.5kR@80h AED),  
254 the expression of the Broad isoforms is delayed (Fig. 3A). Therefore, the expression of  
255 Broad isoforms corresponds to the known changes in ecdysone levels during larval  
256 development and regeneration, and increased Broad expression correlates with the loss  
257 of regenerative capacity.

258 To determine whether Broad isoforms participate in the suppression of  
259 regenerative activity at the end of larval development, we examined the effect of isoform-  
260 specific or pan-isoform disrupting zygotic *br* mutants (in hemizygous males) (Fig. 3B-H)  
261 or pan-isoform targeting *br<sup>RNAi</sup>* expression (Fig. S5E) on regenerative signaling. Loss of  
262 all Broad isoforms in *npr<sup>6</sup>* or *Bx>br<sup>RNAi</sup>* wing discs allows late-damaged discs to  
263 express *dilp8* past the RRP when regenerative activity is usually suppressed (Fig. 3C, G,

264 S5C, F-H). When we examine the induction of regeneration after the RRP using isoform-  
265 specific alleles, we determined that BrZ1 and BrZ2 are necessary for restricting *dilp8*  
266 expression at the RRP (Fig. 3D, E). Our BrZ3-specific allele *br(2Bc<sup>2</sup>)* produced little effect  
267 on *dilp8* expression at the regeneration restriction point, consistent with BrZ3 playing a  
268 limited role in wing development (Fig. 3F). We were unable to obtain BrZ4-specific  
269 mutants to examine the loss-of-function phenotypes of this isoform.

270 When we examine Wg expression in the wing discs of Broad mutants, we observe  
271 additional effects of these mutations on both developmental and regenerative Wg  
272 expression. In the *npr<sup>6</sup>* mutant, which disrupts all the broad isoforms, we observe a  
273 substantial Wg expression reduction in undamaged tissues' hinge region (Fig. 3C). This  
274 reduction is similar to what is seen in the Z2-specific allele *br<sup>28</sup>* (Fig. 3E). In contrast, in  
275 *rbp<sup>5</sup>* mutant discs where the Z1 isoform is specifically disrupted, the hinge expression of  
276 Wg is largely normal in undamaged discs, but the expression pattern of Wg in the margin  
277 is disrupted (Fig. 3D illustrates a representative example). This phenotype may reflect  
278 the role of Broad in regulating Cut expression at the margin (Jia et al., 2016), but we leave  
279 the further examination of this phenotype for later studies. When we examine tissues  
280 damaged after the regeneration restriction point, we see that the *rbp<sup>5</sup>* mutation disabling  
281 the Z1 isoform produces a substantial increase in damage-induced Wg expression in the  
282 hinge (Fig. S5H). In contrast, the Z2-specific mutation *br<sup>28</sup>* and the pan-isoform mutation  
283 *npr<sup>6</sup>* do not produce a significant increase in Wg expression following damage after the  
284 regeneration restriction point. We also observe a slight increase in damage-induced Wg  
285 expression in Z3-specific mutant *2Bc<sup>2</sup>* (Fig. 3F, H). This increase may reflect a non-  
286 autonomous effect of BrZ3 mutation on the regenerating disc. We were unable to  
287 evaluate adult tissues to determine whether the increased regenerative signaling activity  
288 observed in *br* mutants led to improved tissue repair, as all *br* mutants are either non-  
289 pupariating or pupal lethal (D'Avino et al., 1995; Kiss et al., 1988). However, our  
290 experiments demonstrate that Broad splice isoforms mediate the ecdysone-dependent  
291 restriction of regenerative signaling in late larval wing discs.

292

293 Broad splice isoforms regulate the duration of regenerative activity in damaged discs

294 Since Broad isoforms are expressed in damaged tissues as the tissues are  
295 regenerating (Fig. 3A), we wanted to determine how the loss of Broad or specific Broad  
296 isoforms might regulate regenerative activity following early damage of discs (at 80h  
297 AED). In early damaged discs, we observe that the pan-isoform mutant *npr<sup>6</sup>* and the Z2  
298 specific mutant *br<sup>28</sup>* produce higher *dilp8* expression 12-hours following damage (Fig.  
299 S6A-D, E). In addition to differences in the level of *dilp8* expression following damage,  
300 we also observe substantial differences in the duration of damage-induced *dilp8*  
301 expression between the different mutants, with the pan-isoform mutant *npr<sup>6</sup>* and the Z1-  
302 specific mutant, *rbp<sup>5</sup>*, producing *dilp8* expression over a more extended period compared  
303 with control discs, or the Z2-specific mutant *br<sup>28</sup>* (Fig. S6A-D, S7A). These results  
304 suggest that when damage is produced early when the wing disc can initiate a  
305 regenerative response, the duration of *dilp8* expression in the disc is regulated by specific  
306 Broad isoforms. We confirmed this result by using *br<sup>RNAi</sup>* to inhibit all the Broad isoforms  
307 and demonstrated that *Bx>br<sup>RNAi</sup>* discs also produce extended *dilp8* expression following  
308 damage (Fig. S7E-G). In contrast to *dilp8* expression, the effects of the Broad isoform  
309 mutants on Wg expression during regeneration are less apparent. As described above,  
310 the pan-isoform mutant *npr<sup>6</sup>* and the Z2-specific mutant *br<sup>28</sup>* produce reduced levels of  
311 Wg at the hinge region in undamaged tissues (Fig. S6A-D, F S7C). However, all the  
312 mutants can produce a similar relative increase in Wg expression following damage (Fig.  
313 S7D). Finally, Broad isoforms may also regulate the early events associated with either  
314 damage or the initial regenerative response, as we see that the reduction of wing pouch  
315 (and overall disc) size following irradiation damage at 80h AED is much greater in all  
316 isoform mutants, especially Z1-specific *rbp<sup>5</sup>* and Z2-specific *br<sup>28</sup>* mutant discs (Fig. 6A-D,  
317 G, S7B).

318 In summary, our loss-of-function analysis demonstrates that the individual Broad  
319 isoforms play distinct roles in regulating the regenerative signaling response of imaginal  
320 discs damaged after the RRP. In addition, the Broad isoforms also regulate the extent  
321 and duration of Dilp8 signaling produced by discs damaged before the regeneration  
322 restriction point. Based on these observations, we conclude that ecdysone signaling  
323 through Broad is necessary to limit both the tissue's competence to produce a  
324 regenerative response, as well as the duration of that response.

325

326 Expression of individual Broad isoforms is sufficient to limit regeneration

327         Based on our loss-of-function experiments, it appears that the expression of the  
328 Broad isoforms may act to limit the duration of regenerative signaling in discs damaged  
329 before the RRP or block the initiation of regenerative response in discs damaged after  
330 the RRP. To examine whether the expression of individual Broad isoforms is sufficient to  
331 limit regeneration, we expressed each of the Broad isoforms in the wing disc and  
332 examined both regenerative signaling and the regenerative outcome in adult wings.  
333 When we examine regenerative signaling in 80h-damaged discs, we observe that *Bx-*  
334 *Gal4*-driven expression of BrZ1, BrZ2, and BrZ4 limit both *dilp8* and *Wg* expression in the  
335 dorsal compartment of the wing disc, with BrZ1 and BrZ4 producing the strongest  
336 inhibition of regenerative *Wg* expression following damage (Fig. 4A-F, S8A, B). These  
337 distinct effects of Broad isoforms on regenerative *Wg* and *dilp8* expression are also  
338 observed in discs experiencing *eiger*-induced damage. BrZ1, BrZ2, and BrZ4 all produce  
339 a reduction of *dilp8* expression in these regenerating tissues. However, BrZ1 and BrZ4  
340 produce the strongest inhibition of *Wg* expression in the *eiger* damage model (Fig. S8 C-  
341 I). Therefore, all three isoforms can limit regenerative signaling in *eiger*-damage discs.  
342 Consistent with this, RNAi-inhibition of all the Broad isoforms produces elevated levels of  
343 both *Wg* and *dilp8* in *eiger*-damaged tissues (Fig. S8G-I).

344         Constitutive expression of individual Broad isoforms produces substantially  
345 deformed adult wings, making it challenging to assess regenerative outcomes.  
346 Therefore, to determine whether expression of the individual Broad isoforms is sufficient  
347 to inhibit regeneration, we transiently expressed each of the Broad isoforms in the wing  
348 pouch using *rn-Gal4* and used *tub-Gal80<sup>ts</sup>* expression to limit the timing of expression to  
349 a 12-hour window following irradiation (Fig. S9A). We observe that transient expression  
350 of BrZ1, BrZ2, and BrZ4 in undamaged control larvae produces only minor effects on disc  
351 patterning and growth (Fig. 4GH, S9B-E). However, the transient expression of Broad  
352 isoforms following early third instar X-irradiation damage profoundly affects wing  
353 regeneration. Expression of BrZ1, BrZ2, and BrZ4 results in a high proportion of  
354 incompletely regenerated discs and reduced wing blade size. Of the three splice isoforms,

355 BrZ4 produces the most potent inhibition of regeneration, with all the adult wings mis-  
356 patterned and extremely small (Fig. 4G, H, S9B-E).

357 In summary, our isoform expression experiments demonstrate that the local  
358 expression of individual Broad isoforms in damaged tissues is sufficient to block critical  
359 local and systemic regeneration signaling events. Even the transient expression of single  
360 Broad isoforms in regenerating tissues can severely attenuate regeneration in these  
361 tissues.

362

### 363 Ecdysone inhibits and promotes *wg* expression through distinct pathways

364 We have demonstrated here that ecdysone produces dual effects on regenerative  
365 signaling. At lower levels, ecdysone can promote the expression of *Wg* and *dilp8* in  
366 regenerating tissues. At higher levels, ecdysone limits regeneration and the expression  
367 of these regenerative signals through the activation of Broad splice isoforms. To better  
368 understand how ecdysone produces these distinct effects on regenerative signaling, we  
369 examined how ecdysone regulates a regulatory region located ~8 kb downstream of the  
370 *wg* coding region (Fig. S10A), which was previously named BRV118 (Schubiger et al.,  
371 2010) but has more recently been described as the *wg* Damage Responsive Enhancer  
372 (*wg*DRE; (Harris et al., 2020)). The *wg*DRE is critical for the regenerative activation of *wg*  
373 expression following damage. Epigenetic changes at the *wg*DRE towards the end of larval  
374 development lead to the loss of regenerative capacity following the RRP (Harris et al.,  
375 2016). Using a transgenic reporter of *wg*DRE activity (*wg*DRE-GFP, (Harris et al., 2016),  
376 Fig. S10A), we observe the attenuation of damage-induced *wg*DRE activity as larvae  
377 develop past the RRP (Fig. S10B, C). To first determine whether the limitation of  
378 regenerative activity by ecdysone following the regeneration restriction point is mediated  
379 through the *wg*DRE, we measured reporter expression in *Bx>EcR.A<sup>DN</sup>* discs. We see that  
380 blocking ecdysone signaling increases the damage-induced *wg*DRE reporter activity in  
381 the dorsal pouch of discs damaged after the RRP (Fig. 5A, B, D, S10D). Therefore, the  
382 inhibition of the *wg*DRE in late-damaged tissues is dependent on ecdysone signaling in  
383 regenerating disc tissues. Consistent with our earlier observations, we also see that the  
384 inhibition of the *wg*DRE after the regeneration restriction point is dependent on Broad, as

385 late damage can also activate the *wgDRE* in *Bx>br<sup>RNAi</sup>* expressing discs (Fig 5A,C,D,  
386 S10D). To determine whether Broad isoform expression is sufficient to suppress *wgDRE*  
387 activity, we examined whether the damage-induced activation of *wgDRE* before the  
388 regeneration restriction point can be suppressed by expression of Broad isoforms. We  
389 see that expression of BrZ1, BrZ2, and BrZ4 can suppress expression of the *wgDRE*  
390 following early damage (Fig. 5E-I, S10E). Based on these results, we conclude  
391 ecdysone, via Broad isoform expression, can limit regenerative activity by suppressing  
392 the damage-induced activity of the *wgDRE*.

393 To assess how lower levels of ecdysone function to promote regenerative Wg  
394 expression, we first examined how the loss of ecdysone signaling affects Wg expression  
395 in undamaged wing discs. We had observed in Figure 1D, *Bx>EcR.A<sup>DN</sup>* expression  
396 appears to suppress hinge Wg expression in undamaged tissues. To examine this more  
397 carefully, we used MARCM to generate GFP-labeled clones that expressed *EcR.A<sup>DN</sup>*. We  
398 observed the expression of *EcR.A<sup>DN</sup>* produced clones that cell-autonomously inhibited  
399 Wg expression at the hinge regions of the developing wing disc but not at the margin (Fig.  
400 5L, M). This inhibition appears to be a transcriptional regulation of *wg* expression as we  
401 see a similar effect of *EcR.A<sup>DN</sup>* expression on the activity of a *wg* transcriptional reporter  
402 line (*wg-lacZ*, Fig. 5N). It is possible that ecdysone exerts both its inhibitory and activating  
403 effects on Wg expression through the *wgDRE*. However, when we inhibit ecdysone  
404 signaling (*Bx>EcR.A<sup>DN</sup>*) or Broad isoform expression (*Bx>br<sup>RNAi</sup>*) in early-damaged discs,  
405 we see that neither of these manipulations limit *wgDRE* activation (Fig. 5E, J, K, S10E).  
406 Therefore, ecdysone signaling is required for regenerative Wg expression but regulates  
407 *wg* transcription independently of Broad and through a regulatory region that is not part  
408 of the *wgDRE*. These distinct pathways for ecdysone regulation of Wg are summarized  
409 in Figure 5O.

410

#### 411 Ecdysone signaling coordinates regeneration with the duration of the larval period

412 Damage and regeneration of imaginal discs activates a regeneration checkpoint,  
413 a delay in development that extends the larval period. This checkpoint arises from the  
414 expression and release of Dilp8 from regenerating tissues (Colombani et al., 2012; Garelli  
415 et al., 2012). Dilp8 binds to its receptor Lgr3, expressed in both the brain and the

416 ecdysone-producing prothoracic gland, to limit the ecdysone synthesis (Colombani et al.,  
417 2015; Garelli et al., 2015; Jaszczak et al., 2016). This Dilp8-Lgr3 signaling delays the  
418 accumulation of ecdysone at the end of the larval period, extending the regenerative  
419 competence of imaginal discs and delaying the transition to the pupal phase of  
420 development (Garelli et al., 2015; Jaszczak et al., 2016). Because Dilp8 activation of the  
421 regeneration checkpoint extended the regenerative period of development, we (Jaszczak  
422 et al., 2015, 2016; Jaszczak & Halme, 2016) and other researchers (Andersen et al.,  
423 2013; Colombani et al., 2012, 2015; Garelli et al., 2012; Vallejo et al., 2015) have  
424 hypothesized that the extra time was required for the additional growth and repatterning  
425 required to complete regeneration. However, since we have shown that ecdysone  
426 produces a biphasic effect on regenerative signals in the damaged disc, we wanted to  
427 test the hypothesis that checkpoint delay was required to accommodate regeneration. To  
428 do this, we examined regeneration in homozygous *dilp8*<sup>-</sup> larvae, which produce minimal  
429 checkpoint delay following damage (Fig. 6A), and therefore have a shorter regenerative  
430 period. Unexpectedly, adult flies arising from X-irradiated *dilp8*<sup>-</sup> larvae could regenerate  
431 their wing discs as successfully as control *dilp8*<sup>+</sup> (*w<sup>1118</sup>*) adults. The lack of regeneration  
432 checkpoint delay produces no significant impact on either tissue repatterning (Fig. 6B) or  
433 regrowth to target undamaged tissue size. In fact, we see that *dilp8*<sup>-</sup> larva produce  
434 regenerated adult wings that are closer to the undamaged target size than *dilp8*<sup>+</sup> larvae  
435 in which the checkpoint is intact. (Fig. 6C, S11A).

436 To better understand how *dilp8*<sup>-</sup> larvae can regenerate their damaged wing discs  
437 despite the attenuated regenerative period, we measured disc size in undamaged and  
438 regenerating discs through the third instar of *dilp8*<sup>+</sup> and *dilp8*<sup>-</sup> larvae. In control larvae,  
439 damage produces a delay in disc growth, with regenerating imaginal discs being  
440 measurably smaller than undamaged controls between 92 and 116h AED, just before  
441 unirradiated larvae typically end their larval period. However, during the extended larval  
442 period produced by activation of the regenerative checkpoint, the growth of the  
443 regenerating imaginal discs rapidly reaches the target size (the final size of the  
444 undamaged discs) by 128h AED and then remain at that size until the end of the larval  
445 period (Fig. 6D). In *dilp8*<sup>-</sup> larvae, we still observe a growth lag in damaged and  
446 regenerating tissues, with regenerating tissues being significantly smaller between 92 and

447 104h AED. However, unlike *dilp8*<sup>+</sup> larvae, the regenerating imaginal discs in *dilp8*<sup>-</sup> larvae  
448 rapidly grow after 104h AED, reaching target size by 116hAED, just before both control  
449 and *dilp8*<sup>-</sup> larvae pupate (Fig. 6E). When we directly compare the growth of control and  
450 *dilp8*<sup>-</sup> imaginal discs, we see that undamaged discs grow at approximately the same rate  
451 (Fig. S11B), whereas regenerating *dilp8*<sup>-</sup> imaginal discs grow much faster than control  
452 discs (Fig. S11C). In summary, we observe that in the absence of the regeneration  
453 checkpoint, ecdysone synthesis is no longer limited, and the regenerative growth of  
454 imaginal discs is accelerated such that target disc size is still reached by the end of the  
455 shortened larval period. This suggests that the biphasic effect of ecdysone signaling on  
456 disc regeneration is capable of coordinating disc regeneration with the duration of the  
457 larval period.

458 While Dilp8 and checkpoint activation are not necessary for providing additional  
459 time to accommodate regenerative growth, checkpoint activity is essential for maintaining  
460 the viability of pupae following regeneration. The frequency of pupal lethality (pupal cases  
461 where the adults fail to eclose) in control larvae is relatively low, typically ~25% for larvae  
462 irradiated at 25Gy. However, pupal lethality of irradiated *dilp8*<sup>-</sup> larvae is much higher,  
463 ~78% (Fig. 6F). We believe that the increase in pupal lethality is a consequence of  
464 regenerative activity in *dilp8*<sup>-</sup> larvae as control larvae irradiated late (post-RRP), which fail  
465 to initiate a regenerative response, still produce a relatively low rate of pupal lethality  
466 (~30%, Fig. S11D). Therefore, Dilp8 checkpoint activation appears to play an essential  
467 role in preserving the future pupal viability of animals undergoing disc regeneration.

468

## 469 **Discussion**

470

471 Following damage, regenerating *Drosophila* imaginal discs release Dilp8, which  
472 circulates in the larval hemolymph and signals through its receptor Lgr3 in the larval brain  
473 and the PG to limit ecdysone production (Colombani et al., 2012, 2015; Garelli et al.,  
474 2012; Jaszczak et al., 2016; Vallejo et al., 2015). By delaying the increase of ecdysone  
475 that signals the end of larval development, Dilp8 extends the regenerative period  
476 (Colombani et al., 2012; Garelli et al., 2012). However, we demonstrate here that even in  
477 the absence of Dilp8 signaling, damaged wing imaginal discs are capable of the



478 repatterning and growth required to reach their regeneration target in an attenuated  
479 regenerative period (Fig. 6B, C). However, we see that the accelerated regeneration in  
480 *dilp8* larvae is also accompanied by a substantial increase in pupal lethality (Fig. 6F).  
481 This pupal lethality does not appear to result from unrepaired damage, as larvae  
482 irradiated after the RRP when they cannot initiate a regenerative response do not show  
483 elevated levels of pupal lethality (Fig. S11D). Therefore, the role of Dilp8 and regenerative  
484 checkpoint signaling may be primarily to preserve viability in the presence of regenerating  
485 tissues as opposed to providing adequate time for regeneration. In this study, we did not  
486 examine how regeneration checkpoint activation preserves pupal viability. Still, one  
487 possibility is that an extended larval feeding period may allow larvae with regenerating  
488 tissues the ability to store up sufficient energy reserves to both regenerate damaged  
489 tissues and complete metamorphosis. Further study is necessary to understand better  
490 how regeneration impacts pupal viability.

491 In contrast to *dilp8* larvae, which can produce completely regenerated tissues in  
492 an attenuated regenerative period, artificially increasing ecdysone levels through feeding  
493 increases the number of incompletely regenerated tissues substantially (Fig. S2C, D).  
494 This suggests that the changing ecdysone levels that occur throughout the regenerative  
495 period of larval development exert sensitive control over imaginal disc regeneration and  
496 that this regulation is lost when we ectopically manipulate ecdysone levels. In this study,  
497 we demonstrate that ecdysone plays a dual role in regulating regenerative activity in  
498 damaged discs to ensure that regeneration targets are achieved within the larval period.  
499 (Summarized in Fig. 6G). First, we demonstrate that ecdysone signaling in damaged  
500 imaginal discs is necessary for the upregulation of Wg and Dilp8, critical signals mediating  
501 the local and systemic regenerative responses (Fig. 1L, M, N). This observation may  
502 reflect a requirement for ecdysone signaling in Wg expression at the hinge region (Fig.  
503 5L, M, N), which is critical to irradiation-induced regenerative responses (Verghese & Su,  
504 2016). As development progresses through the third instar, ecdysone pulses produced  
505 by the prothoracic gland (PG) cause ecdysone to accumulate in the larvae (Lavrynenko  
506 et al., 2015). We propose that this accumulation initiates a series of concentration-  
507 dependent events (Fig. 2B-F). First, ecdysone promotes regeneration, accelerating  
508 regenerative activity as ecdysone titer increases. Then, when ecdysone titer reaches a

509 high level in the larvae, ecdysone signaling suppresses regenerative activity by activating  
510 the expression of the Broad splice isoforms (Fig 3), which suppress regenerative activity  
511 in damaged discs (Fig. 4).

512 This biphasic, concentration-dependent regulation of regenerative activity allows  
513 ecdysone to coordinate regeneration with the duration of larval development. This  
514 coordinating role may be similar to how ecdysone coordinates imaginal disc patterning  
515 with the larval development period (Alves et al., 2020). Similarly, recently published  
516 experiments have observed that damage of the *Drosophila* hindgut during L2 or early L3  
517 produces Dilp8, delaying the onset of pupariation, whereas damage to the hindgut of  
518 wandering L3 larvae no longer produces Dilp8 or developmental delay. However,  
519 regeneration is still completed in this attenuated period through accelerated mitotic  
520 cycling, which allows the tissue to meet the regeneration target within the mitotic  
521 regeneration window (Cohen et al., 2021). In this example, while ecdysone signaling  
522 regulates the end of mitotic regeneration, the role of ecdysone signaling in producing the  
523 accelerated mitoses has not been investigated.

524 Other pathways have been implicated in regulating regenerative activity in the wing  
525 disc or the loss of regenerative capacity at the end of development. Further experiments  
526 will be required to determine how these pathways are regulated by ecdysone and Broad.  
527 Recent work has demonstrated that Chinmo, which regulates the 'stemness' of cells, is  
528 expressed during early wing disc development and antagonizes BrZ1 to allow  
529 regenerative activity (Narbonne-Reveau & Maurange, 2019). While ecdysone signaling  
530 suppresses Chinmo expression at the RRP (Narbonne-Reveau & Maurange, 2019),  
531 Chinmo has also been shown to regulate EcR activity in other tissues (Marchetti &  
532 Tavosanis, 2017). It is unclear whether ecdysone and Chinmo interact during early larval  
533 development. At the end of larval development, the *Drosophila* genome undergoes  
534 extensive epigenetic changes in preparation for pupation and metamorphosis (Ma &  
535 Buttitta, 2017; Saha et al., 2019). The Polycomb-group proteins (PcG) produce silencing  
536 modifications on the heterochromatin at *wgDRE* to block regeneration after the RRP  
537 (Harris et al., 2016). However, it remains unclear how PcG is recruited to the *wgDRE*.  
538 There is a putative Pc-binding site in the *wgDRE*, but it is not necessary for silencing this  
539 locus at the end of larval development (Harris et al., 2016). Both PcG and Broad are

540 essential for suppressing regeneration genes, and there is evidence that Broad and PcG  
541 physically interact during the development of the wing disc (Lv et al., 2016). Therefore, it  
542 is possible that Broad isoforms may recruit PcG to wgDRE to suppress regeneration at  
543 the end of larval development.

544 In summary, our findings provide new insight into the mechanisms that coordinate  
545 tissue regeneration with the development of the animal as a whole. The steroid hormone  
546 ecdysone has a biphasic, concentration-dependent effect on the regenerative activity of  
547 the *Drosophila* wing imaginal disc. Through this biphasic signaling, ecdysone can  
548 coordinate the completion of regeneration with the end of the larval period of growth in  
549 wild-type larvae and larvae that lack the regeneration checkpoint, where the regenerative  
550 period is attenuated. We demonstrate that the regeneration checkpoint may be important  
551 for maintaining pupal viability in animals that have regenerated their imaginal discs.

552  
553  
554  
555

## 556 **Materials and Methods**

557

### 558 Drosophila stocks and culture

559 Stocks used include *w*<sup>1118</sup> (BDSC\_5905), Bx-Gal4;UAS-Dcr2; (Bilder lab stock),  
560 Dilp8::GFP/TM6B (Derived from BDSC\_33079), UAS-LacZ.NZ (BDSC\_3956), UAS-  
561 EcR.A<sup>W650A</sup> (BDSC\_9451), *y*<sup>1</sup>,*br*<sup>2Bc-2</sup>/Binsn (BDSC\_29969), *y*<sup>1</sup>,*br*<sup>npr-6</sup>/Binsn  
562 (BDSC\_36562), *y*<sup>1</sup>,*br*<sup>bp-5</sup>/Binsn (BDSC\_30138), *y*<sup>1</sup>,*br*<sup>28</sup>,*w*<sup>1</sup>/Binsn (BDSC\_36565), FM7c<sup>tb</sup>  
563 (BDSC\_36337), UAS-BrZ1 (BDSC\_51190), UAS-BrZ2 (BDSC\_51191), UAS-BrZ3  
564 (BDSC\_51192), UAS-BrZ4 (BDSC\_51193), UAS-Dcr2;UAS-BrRNAi (Derived from  
565 BDSC\_27272), Bx-Gal4;UAS-Eiger; (Derived from *regg*<sup>1</sup> stock, from H. Kanda),  
566 *wg*<sup>1</sup>,FRT40A;Dilp8::GFP/SM6-TM6B (Derived from BDSC\_2978 and BDSC\_33079), Bx-  
567 Gal4;*wg*DRE-GFP;*dcr* (Derived from Hariharan lab BRV118-GFP stock), UAS-mCD8-  
568 GFPsFlp;tub-Gal4;FRT82B,tubGal80/TM6B (Siegrist lab stock), UAS-EcR.A[W650A];  
569 FRT82B/SM6-TM6B (Derived from BDSC\_9451), Ubx-Flp;FRT40A;FRT82B  
570 (BDSC\_42733), *wg*-LacZ,UAS-EcR.A[W650A];FRT82B/CyO (Derived from  
571 BDSC\_11205 and BDSC\_9451)

572 Experimental lines and crosses were maintained at 25°C with a 12-hour alternating light-  
573 dark cycle. The developmental timing was synchronized by staging egg-laying on grape  
574 agar plates (Genesee Scientific) during a designated 4-hour interval. Twenty-four hours  
575 after egg deposition (AED), 20 first-instar larvae were transferred into vials or plates  
576 containing standard (cornmeal-yeast-molasses) media (Archon Scientific B101). The  
577 larvae remained undisturbed in the media at 25°C or 18°C until treatments began at the  
578 third larval instar.

579

#### 580 Irradiation Damage and Ecdysone Feeding

581 Staged larvae were either left undamaged or exposed to 20 or 25 Gy X-irradiation  
582 generated from a 43805N X-ray system Faxitron operating at 130 kV and 3.0 mA. The  
583 larvae were exposed to x-irradiation at 80h AED for early damage, 104hAED for late  
584 damage, and 92hAED in experiments in S.1 & S.10.

585 Ecdysone food was prepared by dissolving 20-hydroxyecdysone (Sigma – starting  
586 concentration: 20mg/ml in 95% ethanol) in 2 ml of food media at final concentrations of  
587 0.1, 0.3, 0.6 and 1.0 mg/ml of food, or an equivalent volume of 95% ethanol (0 mg/ml) for  
588 control. Larvae were reared as previously described until 80h AED then transferred to the  
589 ecdysone or ethanol-control food, approximately 6-7 larvae per vial (Halme et al., 2010).

590

#### 591 Pupariation Time and Developmental Delay

592 For calculating purposes, 0h AED was considered to be the middle of the egg-laying  
593 interval. The pupae in each vial were counted approximately every 12 hours, starting  
594 around 104h AED and ending three days after the most recent pupation. The data were  
595 pooled from multiple vials of the same genotype laid on the same day. Data from separate  
596 lays were calculated separately, and at least three lays are represented in each  
597 experiment. Median pupariation time was then calculated (Equation 1). Developmental  
598 delay was considered to be the difference in pupariation time between the experimental  
599 and control groups.

600

601 ***Equation 1: Median pupariation time calculation***

602 
$$Median = T1 + ((T2 - T1) * \frac{0.5 - S1}{S2 - S1})$$

603 Median pupariation time was calculated by first determining the sum fraction of total  
604 pupae counted at each time point for each genotype. The first time point with a sum  
605 fraction of total pupae exceeding 50% indicates that the median pupariation time occurred  
606 between that point and the proceeding time point. We next calculated how long past the  
607 proceeding timepoint 50% of larvae pupated and the difference between the sum  
608 fractions. To determine how far past the first timepoint the median pupariation time was,  
609 we divided the difference from the halfway point by the difference between the sum  
610 fractions then multiplied this by the difference between the time points. We then added  
611 this number to the preceding time point. T2 indicates the later timepoint, T1 indicates the  
612 earlier timepoint, S2 indicates the sum fraction of pupae at T2, S1 indicates the sum  
613 fraction of pupae at T1.

614

#### 615 Tissue Isolation

616 *Adult wings:* adult flies were approximately 36 hours after eclosion, separated according  
617 to sex, and stored in 70% ethanol. No staining or tissue treatment was required. Wings  
618 were isolated and mounted onto slides using Gary's Magic Mounting (GMM – Balsam  
619 powder dissolved in methyl salicylate) media.

620 *Wing discs for imaging:* Larvae were inverted and cleaned in PBS. The larvae carcass  
621 (cuticle with attached imaginal discs) was then fixed with 4% paraformaldehyde in PBS  
622 for 20 mins, followed by two 5-min washes in PBS. In broad mutant experiments, only the  
623 imaginal discs of hemizygous male larvae were isolated. To distinguish male from female  
624 larvae, we visually identified the gonads found in the lower abdominal flank of male larvae  
625 only. Male larvae gonads appear as circular translucent discs visible through the cuticle  
626 (Selva & Stronach, 2007).

627 *Wing discs for Western Blot:* 40-80 imaginal discs (depending on tissue size at each time  
628 point) were isolated from third instar larvae. All tissues were isolated in chilled Schneider's  
629 Insect Medium (Sigma-Aldrich). The dissection dish was placed on ice during the entire  
630 dissection. Isolated tissues were washed twice in chilled PBS and spun down for 15  
631 seconds using a C1008-R Benchmark myFUGE mini centrifuge. Excess PBS was

632 aspirated out, then the tissues (in approximately 50ul of PBS) were frozen in dry ice before  
633 storage at -80°C.

634

### 635 Immunofluorescent Staining

636 The isolated imaginal discs were permeabilized for immunofluorescent staining using two  
637 10-min washes in 0.3% Triton in PBS (PBST), then incubated for 30 mins in a blocking  
638 solution of 10% goat serum (GS) and 0.1% PBST. Then the tissues were incubated in  
639 primary antibody solutions overnight at 4°C on a nutator. Antibody solutions were  
640 prepared in 10% GS in 0.1% PBST. The primary antibodies used are mouse  $\beta$ -Gal (1:250;  
641 Promega #Z3781), mouse anti-Wingless (1:100; DSHB #4D4), and rabbit anti-GFP  
642 (1:1000; Torrey Pines Biolabs #TP401). The samples were washed and blocked again  
643 before incubating in the appropriate secondary antibody solutions (1:1000; ThermoFisher  
644 Alexa488, Cy3, or Alexa633) prepared in 10% GS in 0.1% PBST for 2-4 hours at room  
645 temperature (RT). After two 10-min 0.3% PBST washes and one 5-min PBS wash, the  
646 tissues were stored in 80% glycerol in PBS at 4°C. The tissues were mounted for imaging  
647 within a week of staining. During mounting, imaginal discs were isolated from the stained  
648 carcass and mounted on glass slides with Vectashield (Vector Laboratories).

649

### 650 Imaging, Quantification and Statistical Analysis

651 Adult wings were imaged using MU530-Bi AmScope Microscope Digital Camera and  
652 software. Confocal imaging was done using an Olympus FluoView 1000 from the  
653 University of Virginia Department of Cell Biology and Zeiss LSM 700 and LSM 710 in the  
654 University of Virginia Advanced Microscopy Facility (RRID: SCR\_018736). Laser power  
655 and gain settings for each set of stained samples were based on the experimental group  
656 with the highest fluorescence intensity in each channel and kept constant within the  
657 experiment. All images were taken as z-stacks of 10um intervals. Images were processed  
658 and quantified with Fiji/ImageJ. Representative images used in figures are composites of  
659 the image stacks using max fluorescence projection, while quantification was done using  
660 sum fluorescence composites.

661 The Wingless and GFP (Dilp8 and wgDRE) quantification region was determined  
662 differently in undamaged and irradiation damaged tissues versus tissues damaged by

663 eiger expression (described below). In undamaged and irradiated wing imaginal discs,  
664 Wg was quantified in the dorsal hinge of the imaginal disc pouch by tracing Wingless in  
665 this region from the dorsal edge of the margin. Margin Wg was not quantified, as is it not  
666 associated with the regenerative activity. Ventral hinge Wingless was not quantified as  
667 tissue evagination or folding during mounting often interfered with distinguishing margin  
668 and ventral hinge Wg. GFP fluorescence was quantified in the pouch region of the discs  
669 as defined by the outer edge of hinge Wg expression surrounding the wing pouch. In eiger  
670 damaged tissues, the blastema area was determined by the area of GFP (Dilp8)  
671 expression, and only the Wg within the area of GFP expression was quantified. In  
672 quantification of each damage model, the expression of Wg or GFP in the notum was not  
673 quantified. However, quantification of wing imaginal disc size (unit area) included both  
674 wing pouch and notum.

675 Prism 8 software was used for Statistical Analysis. To compare between independently  
676 repeated experiments, we normalized within the experiment as indicated in figure  
677 legends. The specific tests that were used are listed in the figure descriptions.

678

#### 679 Western Blot

680 Proteins were extracted in 50ul SDS lysis buffer (2% SDS, 60mM Tris-Cl pH6.8, 1X  
681 protease inhibitors, 5mM NaF, 1mM Na orthovanadate, 1mM  $\beta$  glycerophosphate in  
682 distilled H<sub>2</sub>O), sonicated using two 5-sec pulses (microtip Branson sonifier), boiled for 10  
683 minutes at 95<sup>0</sup>C and centrifuged at 15000rpm for 5 mins at RT. The supernatant was  
684 collected for BCA assay and analyzed by SDS-PAGE using Mini-Protean® TGXTM 4–  
685 15% (BioRad) and transferred to nitrocellulose membranes. For Western blot analysis,  
686 membranes were incubated with blocking solution (1% cold water fish gelatin; Sigma  
687 #G7765), primary antibodies (1:500 Broad Core, DSHB #25E9.D7 and 1:10,000 a-tubulin,  
688 Sigma #T6074), followed by appropriate LI-COR IRDye® secondary antibodies and  
689 visualized using the Li-COR Odyssey® CLx Imaging System. Quantifications were  
690 calculated with LI-COR Image Studio™ Software.

691

692

693

694 **Acknowledgments**

695 The authors would like to thank Iswar Hariharan and Rob Harris for *wgDRE* reporter lines  
696 and Andre Landin Malt and Brittany Martinez for WB reagents and assistance. The  
697 authors would like to acknowledge the University of Virginia Advanced Microscopy Facility  
698 (RRID: SCR\_018736) for training and access to the Zeiss LSM700 and LSM710 confocal  
699 microscopes used in this study.

700

701

702 **Competing Interests**

703 No competing interests are declared

704

705 **Funding**

706 This work was supported by the National Institutes of Health (GM099803 to A.H., and  
707 GM008715 to F.K.) and the March of Dimes (5FY1260 to A.H.)

708

709

710 **Data Availability**

711 All data underlying this work will be made available upon request.

712

713

714



## 715 References

- 716 Alves, A. N., Oliveira, M. M., Koyama, T., Shingleton, A., & Mirth, C. (2020). Ecdysone  
717 coordinates plastic growth with robust pattern in the developing wing. *BioRxiv*,  
718 2020.12.16.423141. <https://doi.org/10.1101/2020.12.16.423141>
- 719 Andersen, D. S., Colombani, J., & Léopold, P. (2013). Coordination of organ growth:  
720 Principles and outstanding questions from the world of insects. *Trends in Cell*  
721 *Biology*, 23(7), 336–344. <https://doi.org/10.1016/j.tcb.2013.03.005>
- 722 Bayer, C. A., Holley, B., & Fristrom, J. W. (1996). A Switch in Broad-Complex Zinc-  
723 Finger Isoform Expression Is Regulated Posttranscriptionally during the  
724 Metamorphosis of *Drosophila* Imaginal Discs. *Developmental Biology*, 177(1), 1–  
725 14. <https://doi.org/10.1006/dbio.1996.0140>
- 726 Burdette, W. J. (1962). Changes in titer of ecdysone in *Bombyx mori* during  
727 metamorphosis. *Science*, 135(3502), 432.  
728 <https://doi.org/10.1126/science.135.3502.432>
- 729 Cherbas, L., Hu, X., Zhimulev, I., Belyaeva, E., & Cherbas, P. (2003). EcR isoforms in  
730 *Drosophila*: Testing tissue-specific requirements by targeted blockade and rescue.  
731 In *Development* (Vol. 130, Issue 2, pp. 271–284). <https://doi.org/10.1242/dev.00205>
- 732 Cohen, E., Peterson, N. G., Sawyer, J. K., & Fox, D. T. (2021). Accelerated cell cycles  
733 enable organ regeneration under developmental time constraints in the *Drosophila*  
734 hindgut. *Developmental Cell*, 1–14. <https://doi.org/10.1016/j.devcel.2021.04.029>
- 735 Colombani, J., Andersen, D. S., Boulan, L., Boone, E., Romero, N., Virolle, V., Texada,  
736 M., & Léopold, P. (2015). *Drosophila* Lgr3 Couples Organ Growth with Maturation  
737 and Ensures Developmental Stability. *Current Biology*, 25(20), 2723–2729.  
738 <https://doi.org/10.1016/j.cub.2015.09.020>
- 739 Colombani, J., Andersen, D. S., & Léopold, P. (2012). Secreted peptide dilp8  
740 coordinates *Drosophila* tissue growth with developmental timing. *Science*,  
741 336(6081), 582–585. <https://doi.org/10.1126/science.1216689>
- 742 D'Avino, P. P., Crispi, S., Polito, L. C., & Furia, M. (1995). The role of the BR-C locus on  
743 the expression of genes located at the ecdysone-regulated 3C puff of *Drosophila*  
744 *melanogaster*. *Mechanisms of Development*, 49(3), 161–171.  
745 [https://doi.org/10.1016/0925-4773\(94\)00313-C](https://doi.org/10.1016/0925-4773(94)00313-C)
- 746 DiBello, P. R., Withers, D. A., Bayer, C. A., Fristrom, J. W., & Guild, G. M. (1991). The  
747 *Drosophila* Broad-Complex encodes a family of related proteins containing zinc  
748 fingers. *Genetics*, 129(2), 385–397.  
749 <https://www.ncbi.nlm.nih.gov/pmc/articles/PMC1204631/pdf/ge1292385.pdf>
- 750 Emery, I. F., Bedian, V., & Guild, G. M. (1994). Differential expression of broad-complex  
751 transcription factors may forecast tissue-specific developmental fates during  
752 *drosophila* metamorphosis. *Development*, 120(11), 3275–3287.  
753 <https://doi.org/10.1242/dev.120.11.3275>
- 754 Garelli, A., Gontijo, A. M., Miguela, V., Caparros, E., & Dominguez, M. (2012). Imaginal  
755 Discs Secrete Insulin-Like Peptide 8 to Mediate Plasticity of Growth and  
756 Maturation. *Science*, 336(6081), 579–582. <https://doi.org/10.1126/science.1216735>
- 757 Garelli, A., Heredia, F., Casimiro, A. P., Macedo, A., Nunes, C., Garcez, M., Dias, A. R.  
758 M. M., Volonte, Y. A., Uhlmann, T., Caparros, E., Koyama, T., & Gontijo, A. M.  
759 (2015). Dilp8 requires the neuronal relaxin receptor Lgr3 to couple growth to  
760 developmental timing. *Nature Communications*, 6, 8732.

- 761 <https://doi.org/10.1038/ncomms9732>
- 762 Halme, A., Cheng, M., & Hariharan, I. K. (2010). Retinoids Regulate a Developmental  
763 Checkpoint for Tissue Regeneration in *Drosophila*. *Current Biology*, 20(5), 458–  
764 463. <https://doi.org/10.1016/j.cub.2010.01.038>
- 765 Harris, R. E., Setiawan, L., Saul, J., & Hariharan, I. K. (2016). Localized epigenetic  
766 silencing of a damage-activated WNT enhancer limits regeneration in mature  
767 *Drosophila* imaginal discs. *ELife*, 5(February). <https://doi.org/10.7554/eLife.11588>
- 768 Harris, R. E., Stinchfield, M. J., Nystrom, S. L., McKay, D. J., & Hariharan, I. K. (2020).  
769 Damage-responsive, maturity-silenced enhancers regulate multiple genes that  
770 direct regeneration in *drosophila*. *ELife*, 9(June), 1–26.  
771 <https://doi.org/10.7554/eLife.58305>
- 772 Hirose, K., Payumo, A. Y., Cutie, S., Hoang, A., Zhang, H., Guyot, R., Lunn, D., Bigley,  
773 R. B., Yu, H., Wang, J., Smith, M., Gillett, E., Muroy, S. E., Schmid, T., Wilson, E.,  
774 Field, K. A., Reeder, D. A. M., Maden, M., Yartsev, M. M., ... Huang, G. N. (2019).  
775 Evidence for hormonal control of heart regenerative capacity during endothermy  
776 acquisition. *Science*, 364(6436), 184–188. <https://doi.org/10.1126/science.aar2038>
- 777 Hodgetts, R. B., Sage, B., & O'Connor, J. D. (1977). Ecdysone titers during  
778 postembryonic development of *Drosophila melanogaster*. *Developmental Biology*,  
779 60(1), 310–317. [https://doi.org/10.1016/0012-1606\(77\)90128-2](https://doi.org/10.1016/0012-1606(77)90128-2)
- 780 Jaszczak, J. S., & Halme, A. (2016). Arrested development: coordinating regeneration  
781 with development and growth in *Drosophila melanogaster*. *Current Opinion in*  
782 *Genetics and Development*, 40, 87–94. <https://doi.org/10.1016/j.gde.2016.06.008>
- 783 Jaszczak, J. S., Wolpe, J. B., Bhandari, R., Jaszczak, R. G., & Halme, A. (2016).  
784 Growth coordination during *Drosophila melanogaster* imaginal disc regeneration is  
785 mediated by signaling through the relaxin receptor Lgr3 in the prothoracic gland.  
786 *Genetics*, 204(2), 703–709. <https://doi.org/10.1534/genetics.116.193706>
- 787 Jaszczak, J. S., Wolpe, J. B., Dao, A. Q., & Halme, A. (2015). Nitric oxide synthase  
788 regulates growth coordination during *Drosophila melanogaster* imaginal disc  
789 regeneration. *Genetics*, 200(4), 1219–1228.  
790 <https://doi.org/10.1534/genetics.115.178053>
- 791 Jia, D., Bryant, J., Jevitt, A., Calvin, G., & Deng, W. M. (2016). The Ecdysone and Notch  
792 Pathways Synergistically Regulate Cut at the Dorsal-Ventral Boundary in  
793 *Drosophila* Wing Discs. *Journal of Genetics and Genomics*, 43(4), 179–186.  
794 <https://doi.org/10.1016/j.jgg.2016.03.002>
- 795 Kiss, I., Beaton, A. H., Tardiff, J., Fristrom, D., & Fristrom, J. W. (1988). Interactions and  
796 developmental effects of mutations in the Broad-Complex of *Drosophila*  
797 *melanogaster*. *Genetics*, 118(2), 247–259.  
798 <https://doi.org/10.1093/genetics/118.2.247>
- 799 Lavrynenko, O., Rodenfels, J., Carvalho, M., Dye, N. A., Lafont, R., Eaton, S., &  
800 Shevchenko, A. (2015). The ecdysteroidome of *Drosophila*: Influence of diet and  
801 development. *Development (Cambridge)*, 142(21), 3758–3768.  
802 <https://doi.org/10.1242/dev.124982>
- 803 Lv, X., Han, Z., Chen, H., Yang, B., Yang, X., Xia, Y., Pan, C., Fu, L., Zhang, S., Han,  
804 H., Wu, M., Zhou, Z., Zhang, L., Li, L., Wei, G., & Zhao, Y. (2016). A positive role  
805 for polycomb in transcriptional regulation via H4K20me1. *Nature Publishing Group*,  
806 26(26), 529–542. <https://doi.org/10.1038/cr.2016.33>

- 807 Ma, Y., & Buttitta, L. (2017). Chromatin organization changes during the establishment  
808 and maintenance of the postmitotic state. *Epigenetics and Chromatin*, *10*(1), 1–20.  
809 <https://doi.org/10.1186/s13072-017-0159-8>
- 810 Marchetti, G., & Tavosanis, G. (2017). Steroid Hormone Ecdysone Signaling Specifies  
811 Mushroom Body Neuron Sequential Fate via Chinmo. *Current Biology*, *27*(19),  
812 3017–3024.e4. <https://doi.org/10.1016/j.cub.2017.08.037>
- 813 Marshall, L. N., Vivien, C. J., Girardot, F., Péricard, L., Scerbo, P., Palmier, K.,  
814 Demeneix, B. A., & Coen, L. (2019). Stage-dependent cardiac regeneration in  
815 *Xenopus* is regulated by thyroid hormone availability. *Proceedings of the National*  
816 *Academy of Sciences of the United States of America*, *116*(9), 3614–3623.  
817 <https://doi.org/10.1073/pnas.1803794116>
- 818 Narbonne-Reveau, K., & Maurange, C. (2019). Developmental regulation of  
819 regenerative potential in *Drosophila* by ecdysone through a bistable loop of ZBTB  
820 transcription factors. *PLoS Biology*, *17*(2).  
821 <https://doi.org/10.1371/journal.pbio.3000149>
- 822 Rewitz, K. F., Yamanaka, N., & O'Connor, M. B. (2013). Developmental Checkpoints  
823 and Feedback Circuits Time Insect Maturation. In *Current Topics in Developmental*  
824 *Biology* (Vol. 103, pp. 1–33). NIH Public Access. <https://doi.org/10.1016/B978-0-12-385979-2.00001-0>
- 825
- 826 Saha, P., Sowpati, D. T., & Mishra, R. K. (2019). Epigenomic and genomic landscape of  
827 *Drosophila melanogaster* heterochromatic genes. *Genomics*, *111*(2), 177–185.  
828 <https://doi.org/10.1016/j.ygeno.2018.02.001>
- 829 Schubiger, M., Sustar, A., & Schubiger, G. (2010). Regeneration and  
830 transdetermination: The role of wingless and its regulation. *Developmental Biology*,  
831 *347*(2), 315–324. <https://doi.org/10.1016/j.ydbio.2010.08.034>
- 832 Seifert, A. W., & Voss, S. R. (2013). Revisiting the relationship between regenerative  
833 ability and aging. In *BMC Biology* (Vol. 11, Issue 1, pp. 1–4). BioMed Central.  
834 <https://doi.org/10.1186/1741-7007-11-2>
- 835 Selva, E. M., & Stronach, B. E. (2007). Germline clone analysis for maternally acting  
836 *Drosophila* hedgehog components. In *Methods in Molecular Biology* (Vol. 397,  
837 Issue December). <https://doi.org/10.1385/1-59745-516-4:129>
- 838 Smith-Bolton, R. K., Worley, M. I., Kanda, H., & Hariharan, I. K. (2009). Regenerative  
839 Growth in *Drosophila* Imaginal Discs Is Regulated by Wingless and Myc.  
840 *Developmental Cell*, *16*(6), 797–809. <https://doi.org/10.1016/j.devcel.2009.04.015>
- 841 Vallejo, D. M., Juarez-Carreño, S., Bolívar, J., Morante, J., & Dominguez, M. (2015). A  
842 brain circuit that synchronizes growth and maturation revealed through Dilp8  
843 binding to Lgr3. *Science*, *350*(6262). <https://doi.org/10.1126/science.aac6767>
- 844 Verghese, S., & Su, T. T. (2016). *Drosophila* Wnt and STAT Define Apoptosis-Resistant  
845 Epithelial Cells for Tissue Regeneration after Irradiation. *PLoS Biology*, *14*(9),  
846 e1002536. <https://doi.org/10.1371/journal.pbio.1002536>
- 847 Von Kalm, L., Crossgrove, K., Von Seggern, D., Guild, G. M., & Beckendorf, S. K.  
848 (1994). The Broad-Complex directly controls a tissue-specific response to the  
849 steroid hormone ecdysone at the onset of *Drosophila* metamorphosis. *The EMBO*  
850 *Journal*, *13*(15), 3505–3516. <https://doi.org/10.1002/j.1460-2075.1994.tb06657.x>
- 851 Yamanaka, N., Rewitz, K. F., & O'Connor, M. B. (2013). Ecdysone Control of  
852 Developmental Transitions: Lessons from *Drosophila* Research. *Annual Review of*

853 *Entomology*, 58(1), 497–516. <https://doi.org/10.1146/annurev-ento-120811-153608>  
854 Yun, M. H. (2015). Changes in regenerative capacity through lifespan. In *International*  
855 *Journal of Molecular Sciences* (Vol. 16, Issue 10, pp. 25392–25432).  
856 Multidisciplinary Digital Publishing Institute (MDPI).  
857 <https://doi.org/10.3390/ijms161025392>  
858

859 **Figures and Figure Legends**

860

861 **Figure 1.**

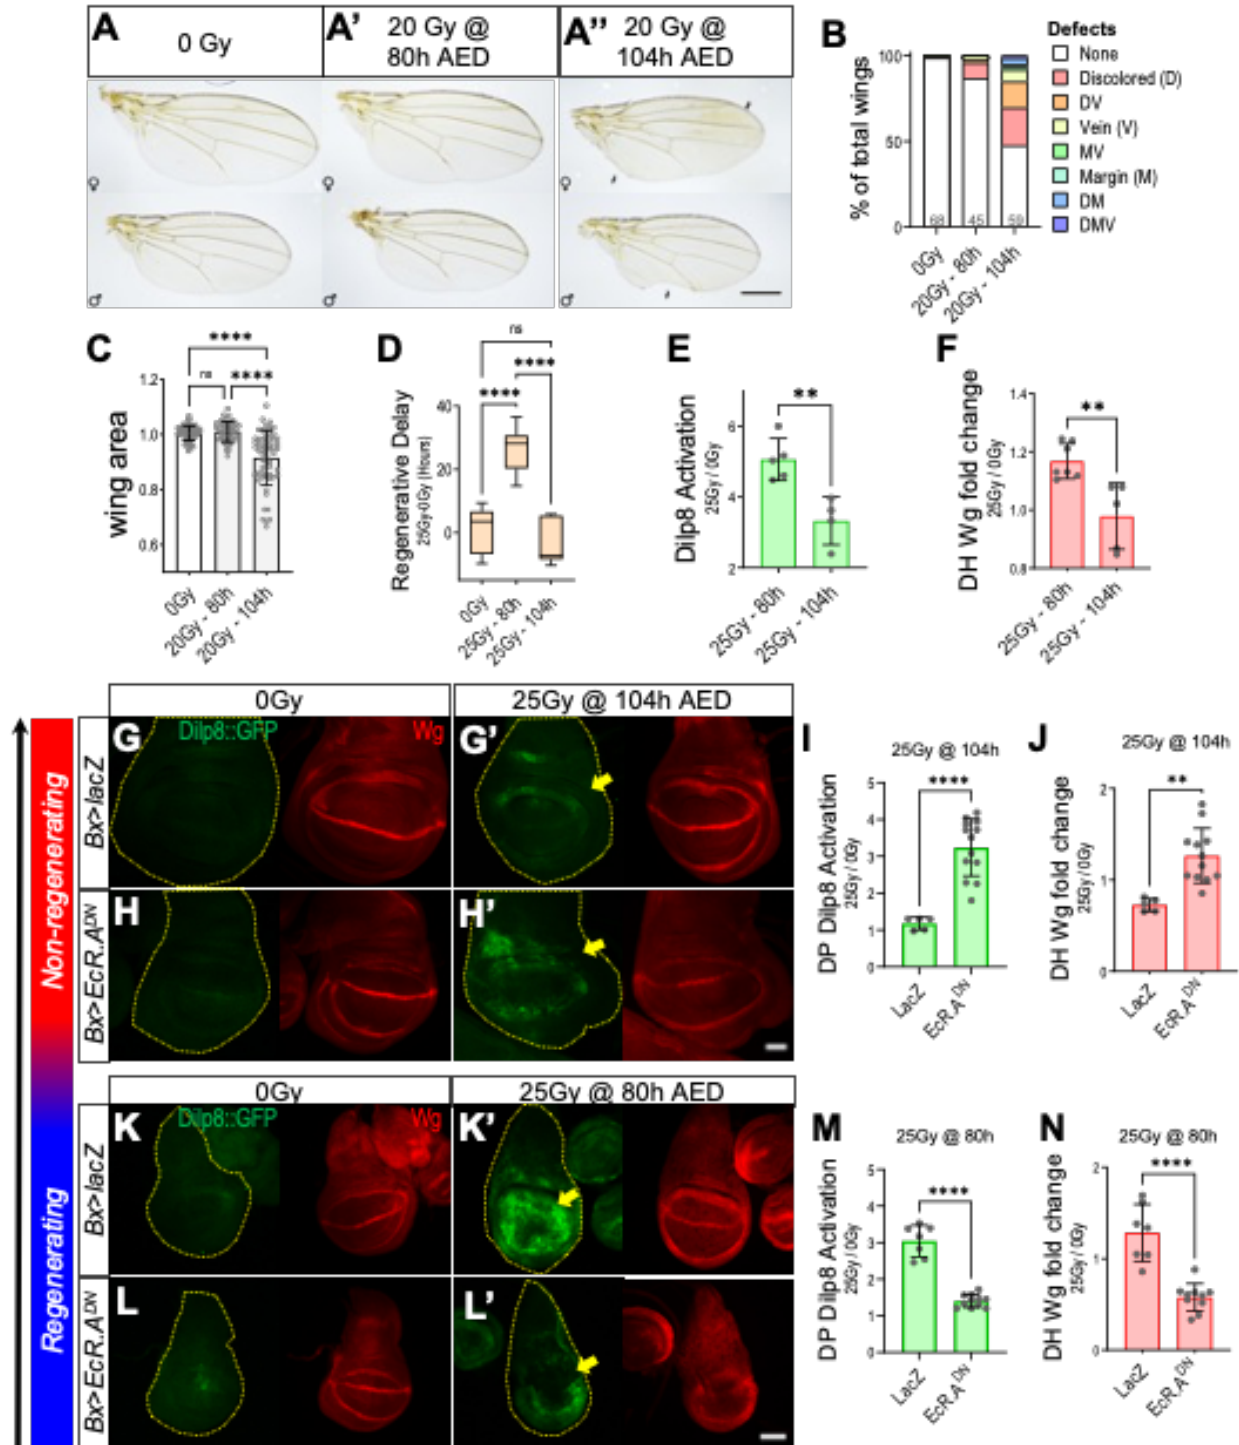

862

863 **Figure 1. Ecdysone signaling is necessary for the suppression and activation of**  
864 **regeneration pathways. (A)** Representative images of adult female and male wings  
865 isolated from flies that were undamaged (A), damaged in early 3<sup>rd</sup> larval instar - 20Gy X-  
866 irradiation at 80h AED (A'), or damaged in late 3<sup>rd</sup> larval instar - 20Gy X-irradiation at  
867 104h AED, when regenerative capacity is restricted (A''). Black arrows indicate defects  
868 on late damage wings. Scale = 500µm. **(B)** Adult wings that show individual defects or  
869 combinations of defects increase following late damage. The graph shows the  
870 percentage of defective adult wings from larvae that had no damage (0Gy), early  
871 damage (25Gy-80h), and late damage (20Gy-104h) during wing development.  
872 Population size is indicated in the graph. **(C)** Quantification of adult wing size following  
873 no damage (0Gy), early damage (20Gy-80h), and late damage (20Gy-104h). Size of  
874 wing measured in the unit area and normalized to undamaged wing size of respective  
875 sex. One-way ANOVA with Tukey's multiple comparisons test, \*\*\*\*p<0.0001. **(D)**  
876 Quantification of regenerative delay in undamaged (0Gy), early damage (20Gy-80h),  
877 and late damage (20Gy-104h). One-way ANOVA with Tukey's multiple comparisons  
878 test, \*\*\*\*p<0.0001. **(E-F)** Quantification of relative Dilp8::GFP expression in wing pouch  
879 (E) and Wg expression in Dorsal Hinge (DH) (F); normalized to expression levels in  
880 undamaged tissues at each respective timepoint tissues. \*\*p<0.01, Unpaired t-test. **(G-**  
881 **H)** Representative images of pouch Dilp8::GFP (green) and dorsal hinge Wg (red)  
882 expression in 116h AED wing imaginal discs. The yellow dotted line indicates tissue  
883 area. Tissues are expressing lacZ (*bx>lacZ*) as a control (G-G') or *EcR.A<sup>DN</sup>*  
884 (*bx>EcR.A<sup>W650A</sup>*, H-H') in the dorsal wing pouch region, indicated by yellow arrows.  
885 Tissues were either left undamaged (G and H) or damaged late, 25Gy@104h AED (G'  
886 and H'), then isolated 12 hours after damage timepoint. Scale bar = 50µm. **(I-J)**  
887 Quantification of relative regenerative activity using fold change in Dilp8::GFP  
888 expression in the dorsal wing pouch (DP) (I) and dorsal hinge (DH) Wg expression (J)  
889 following late damage (25Gy-104h), in *bx>lacZ* and *bx>EcR.A<sup>DN</sup>* wing imaginal discs.  
890 Fold change determined by normalizing to respective undamaged tissues, \*\*\*\*p<0.0001,  
891 \*\*p<0.01, Mann Whitney t-test. **(K-L)** Representative images of pouch Dilp8::GFP  
892 (green) and dorsal hinge Wg (red) expression in 92h AED wing imaginal discs. The  
893 yellow dotted line indicates tissue area. Tissues are expressing lacZ (K-K') or *EcR.A<sup>DN</sup>*

894 (L-L') in the dorsal wing pouch region, indicated by yellow arrows. Tissues were either  
895 left undamaged (K and L) or damaged early, 25Gy@80h AED (K' and L'), then isolated  
896 12 hours after damage timepoint. Scale bar = 50um. **(M-N)** Quantification of relative  
897 regenerative activity using fold change in Dilp8::GFP expression in the dorsal wing  
898 pouch (M) and dorsal hinge (DH) Wg expression (N) following early damage (25Gy-  
899 80h), in *Bx>lacZ* and *Bx>EcR.A<sup>DN</sup>* wing imaginal discs. Fold change determined by  
900 normalizing to respective undamaged tissues, \*\*\*\*p<0.0001, \*\*p<0.01, \*p<0.05, Mann  
901 Whitney t-test.  
902  
903

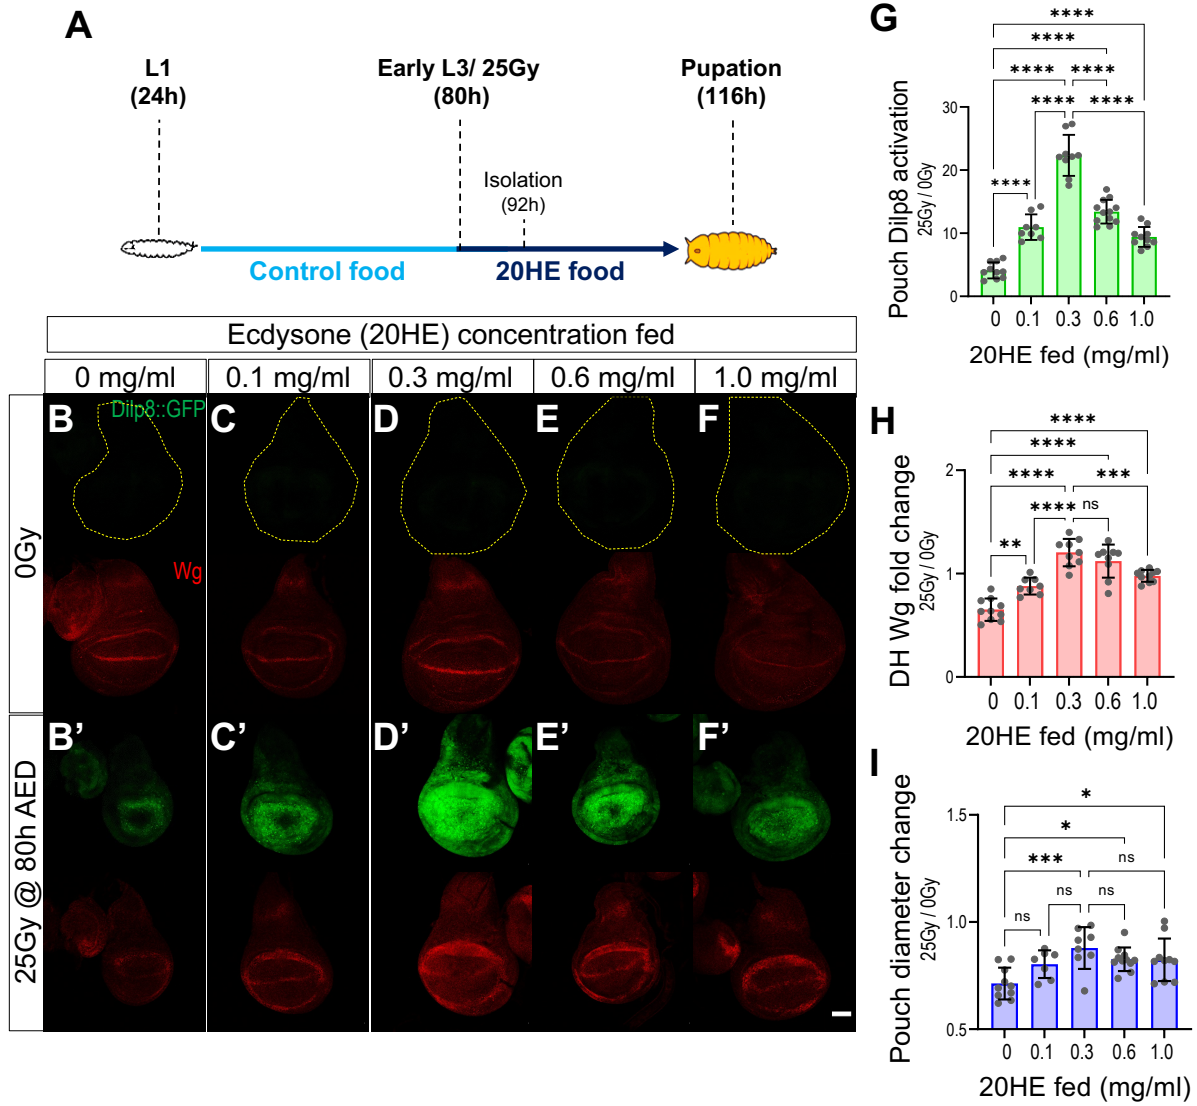



907 **Figure 2. Ecdysone regulates regenerative signaling in a biphasic, concentration-**  
908 **dependent manner. (A)** Schematic of ecdysone (20HE in ethanol) feeding experiment.  
909 *w<sup>1118</sup>* larvae were fed various 20HE concentrations in early third instar (80h AED)  
910 immediately after irradiation damage (25Gy @ 80h AED) or no damage (0Gy). Tissues  
911 were isolated 12 hours after damage and feeding (92h AED). **(B-F)** Representative  
912 images of pouch Dilp8::GFP (green) and dorsal hinge Wg (red) expression in 92h AED  
913 undamaged (B-F) and early damaged – 25Gy @ 80h AED (B'-F') wing imaginal discs.  
914 The yellow dotted line indicates tissue area. The *w<sup>1118</sup>* larvae were fed 20HE of various  
915 concentrations, 0mg/ml (B-B'), 0.1mg/ml (C-C'), 0.3mg/ml (D-D'), 0.6mg/ml (E-E') and  
916 1.0mg/ml (F-F'). Scale bar = 50um. **(G-I)** Quantification of relative regenerative activity  
917 using fold change of Dilp8::GFP expression in the wing pouch (G), dorsal hinge (DH),  
918 Wg expression (H), and pouch diameter (I) in 20HE fed and early damaged *w<sup>1118</sup>* wing  
919 imaginal discs. Fold change determined by normalizing to respective undamaged  
920 tissues, \*\*\*\*p<0.0001, \*\*\*p<0.001, \*\*p<0.01, \*p<0.05, One-way ANOVA with Tukey's  
921 multiple comparisons tests  
922  
923

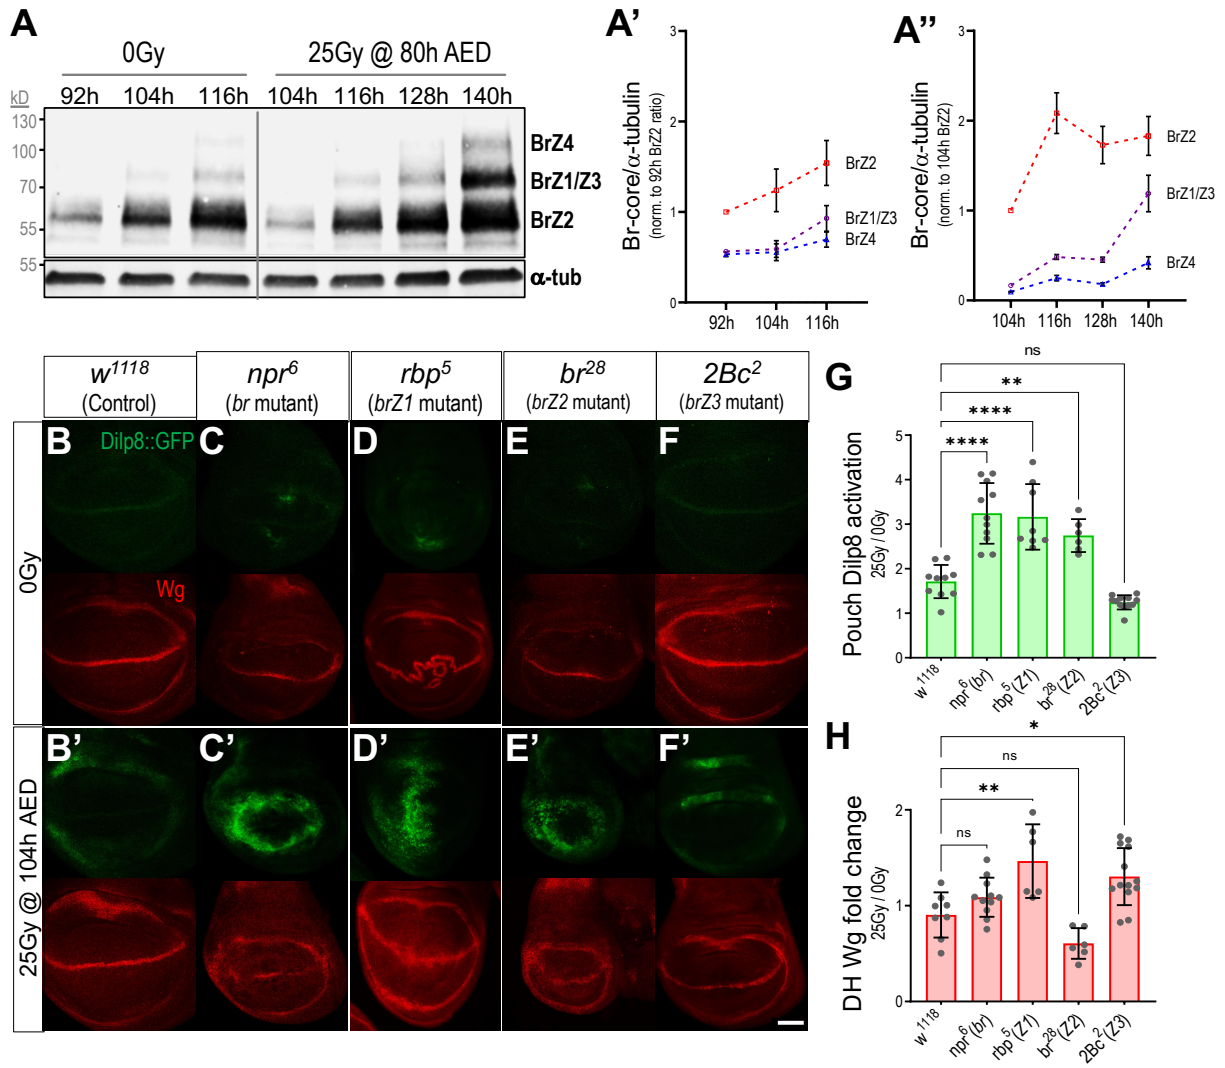

926 **Figure 3. Broad isoforms are necessary for the restriction of regenerative activity**  
927 **at the end of larval development. (A)** Western Blot (A) time course of Broad isoform  
928 expression in undamaged and early damaged  $w^{1118}$  wing imaginal discs. Tissues were  
929 isolated in 12-hour intervals. Due to limitations of tissue size, isolation of tissues started  
930 at 92h AED for undamaged tissues and 104h AED for damaged tissues. Broad core  
931 antibody was used to visualize BrZ4 (~110kD), BrZ1/3 (~90kD), and BrZ2 (~55-65kD),  
932 while  $\alpha$ -tub (~50kD) was used as a loading control. Protein size (kD) ladder - on the  
933 left. Quantification of Broad expression in undamaged (A') normalized to 92h AED BrZ2  
934 expression, n=5. Quantification of broad expression in damaged (A'') wing discs  
935 normalized to 104h AED BrZ2 expression, n=3. **(B-F)** Loss of Broad isoforms allows for  
936 activation of regenerative activity past the regeneration restrictive time point. Images  
937 show representative examples of pouch Dilp8::GFP (green) and dorsal hinge Wg (red)  
938 expression in 116h AED wing discs of undamaged (B-F), and late damage – 25Gy @  
939 104h AED (B'-F'), control –  $w^{1118}$  (B-B'), and *br* mutants: full *br* mutant -  $npr^6$  (C-C'),  
940 *brZ1* mutant -  $rbp^5$  (D-D'), *brZ2* mutant -  $br^{28}$  (E-E'), and *brZ3* mutant -  $2Bc^2$  (F-F'). **(G-H)**  
941 Quantification of relative regenerative activity using fold change in pouch Dilp8::GFP  
942 expression (G) and dorsal hinge Wg expression (H) in late damaged  $w^{1118}$  and *br*  
943 mutants wing imaginal discs. Fold change determined by normalizing to respective  
944 undamaged tissues, \*\*\*\*p<0.0001, \*\*p<0.01, \*p<0.05 One-way ANOVA with Tukey's  
945 multiple comparisons tests  
946  
947

948 **Figure 4.**

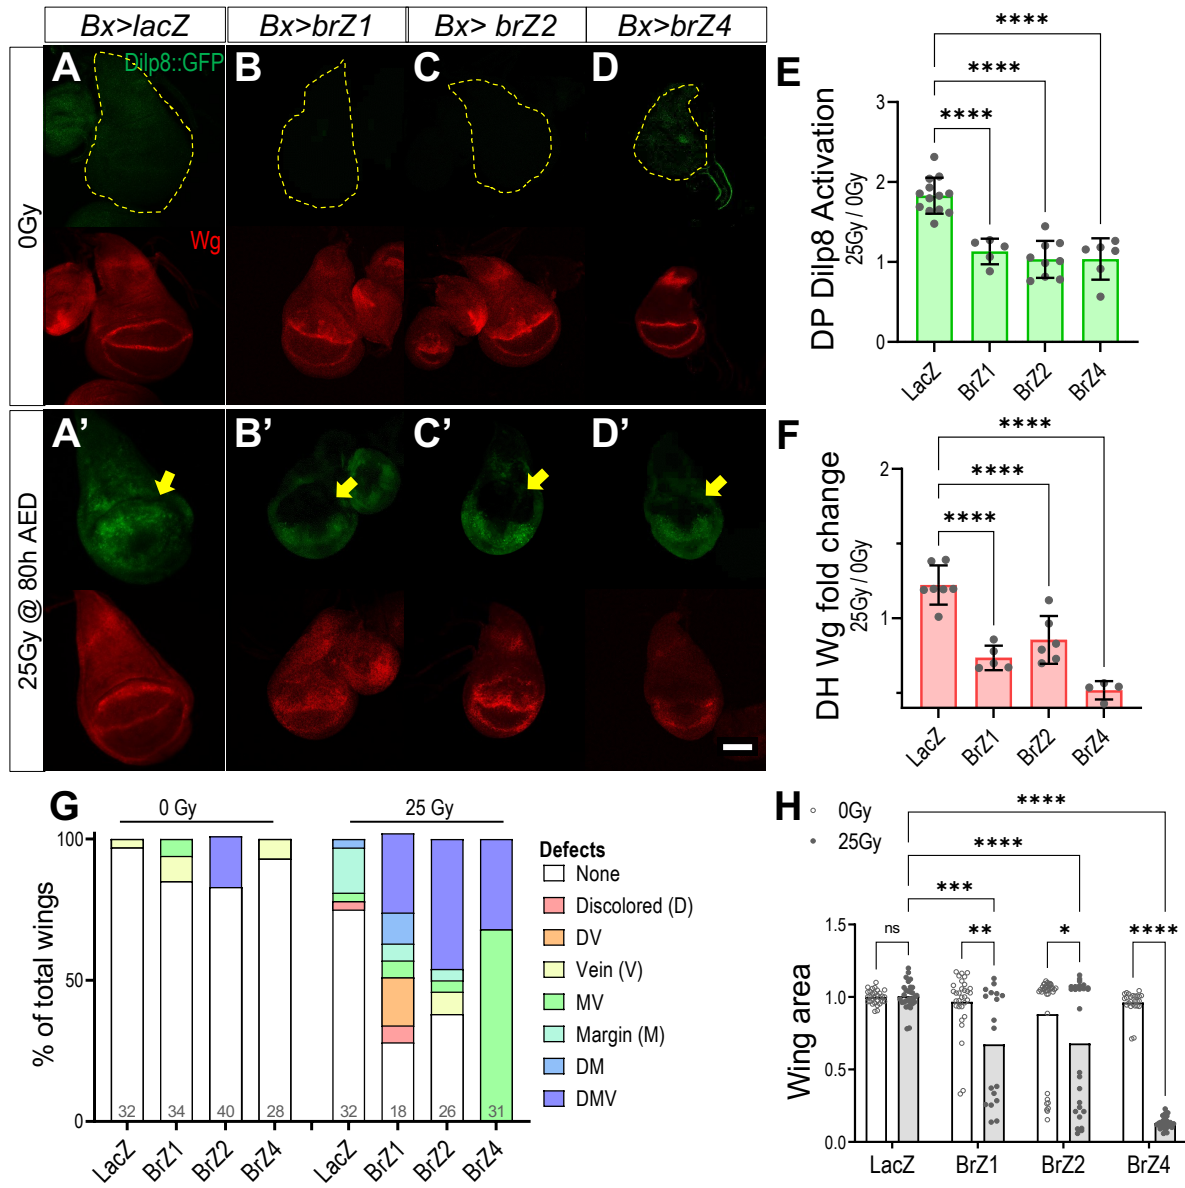

949

950

951 **Figure 4. Broad isoform expression is sufficient to suppress regenerative**  
952 **signaling in damaged imaginal discs. (A-D)** Representative images of pouch  
953 *Dilp8::GFP* (green) and dorsal hinge *Wg* (red) expression in 92h AED undamaged (A-  
954 E), and early damaged - 25Gy @ 80h AED (A'-E') wing imaginal discs. The yellow  
955 dotted line indicates tissue area. Tissues are expressing *lacZ* (*Bx>lacZ*) as a control (A-  
956 A') or *br* isoforms, *Bx>brZ1* (B-B'), *Bx>brZ2* (C-C'), and *Bx>brZ4* (D-D'). Primary area of  
957 expression indicated by yellow arrows. Scale bar=50um. **(E-F)** Quantification of relative  
958 regenerative activity using fold change in dorsal pouch *Dilp8::GFP* expression (E) and  
959 dorsal hinge *Wg* expression (F) in early damaged, control - *Bx>lacZ* and *br* isoform  
960 overexpressing wing imaginal discs. Fold change determined by normalizing to  
961 respective undamaged tissues, \*\*\*\* $p < 0.0001$ , \*\* $p < 0.01$  \* $p < 0.05$ , One-way ANOVA with  
962 Tukey's multiple comparisons tests. **(G)** Adult wings that show individual defects or  
963 combinations of defects increase following late damage. The graph shows the  
964 percentage of defective adult wings from larvae transiently overexpressing *lacZ*, *brZ1*,  
965 *brZ2*, and *brZ4* (*rn-gal4*) with no damage (0Gy) and early damage (25Gy) during wing  
966 development. Population size is indicated in the graph. **(H)** Quantification of adult wing  
967 size for tissue in (G). Size of wing measured in unit area and normalized to undamaged  
968 *rn>lacZ* wing size of respective sex. Two-way ANOVA with Tukey's multiple  
969 comparisons test, \*\*\*\* $p < 0.0001$   
970  
971

972 **Figure 5.**

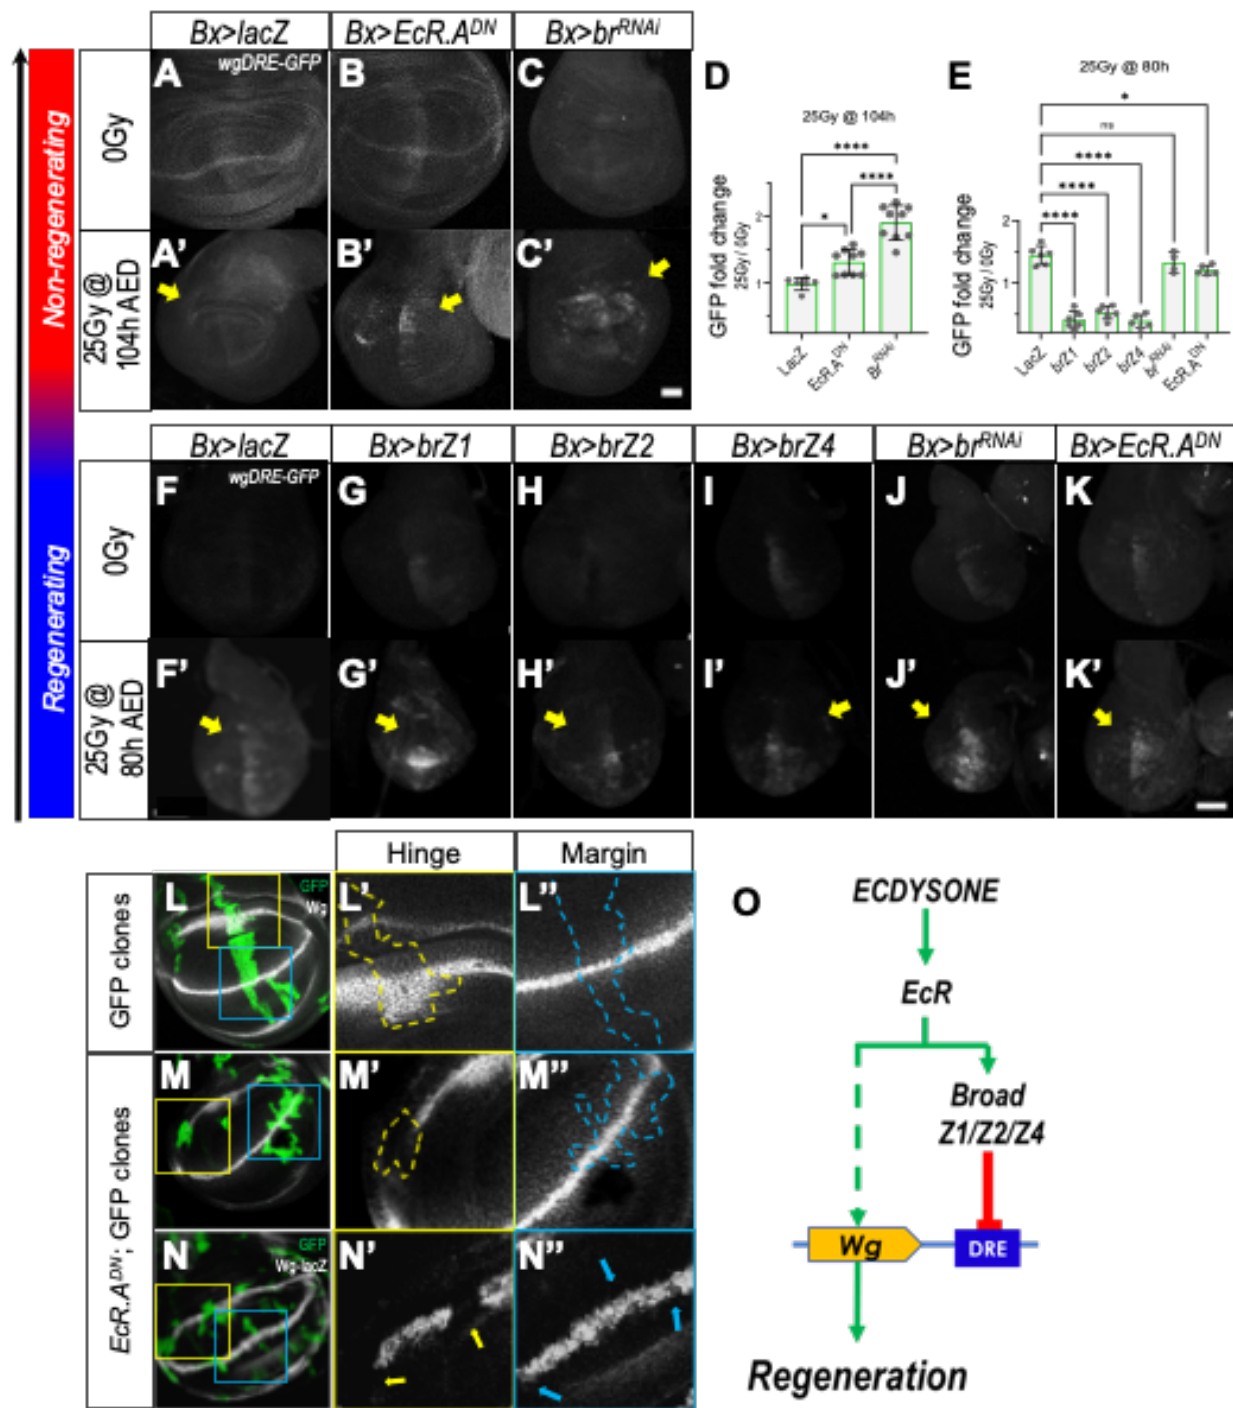

973

974

975 **Figure 5. Ecdysone signaling regulates Wg expression**  
976 **(A-C)** Representative images of wgDRE-GFP (grey) expression in 116h AED  
977 undamaged (A-C) and late damaged - 25Gy @ 104h AED (A'-C') wing imaginal discs.  
978 Yellow arrows indicate the primary area of Gal4-UAS expression. Tissues are  
979 expressing lacZ (*Bx>lacZ*) as a control (A-A'), *Bx>EcR<sup>DN</sup>* (B-B'), and *Bx>br<sup>RNAi</sup>* (C-C').  
980 Scale bar=50um. **(D)** Quantification of dorsal pouch wgDRE-GFP expression fold  
981 change following late damaged (25Gy-104h), control - *Bx>lacZ*, *Bx>EcR<sup>DN</sup>* and  
982 *Bx>br<sup>RNAi</sup>* overexpressing wing imaginal discs. Quantification normalized to respective  
983 undamaged tissues. \*\*\*\*p<0.0001, \*p<0.05, One-way ANOVA with Tukey's multiple  
984 comparisons tests. **(E)** Quantification of dorsal pouch wgDRE-GFP expression fold  
985 change following early damaged, control - *bx>lacZ*, *br* isoform overexpressing, *br*  
986 knockdown, and *EcR<sup>DN</sup>* expressing wing imaginal discs. Normalized to respective  
987 undamaged tissues, \*\*\*\*p<0.0001, \*\*p<0.01, One-way ANOVA with Tukey's multiple  
988 comparisons test. **(F-K)** Representative images of wgDRE-GFP (grey) expression in  
989 92h AED undamaged (F-K) and early damaged - 25Gy @ 80h AED (F'-K') wing  
990 imaginal discs. Tissues are expressing lacZ (*Bx>lacZ*) as a control (F-F') or *br* isoforms,  
991 *Bx>brZ1* (G-G'), *Bx>brZ2* (H-H'), *Bx>brZ4* (I-I'), *Bx>br<sup>RNAi</sup>* (J-J'), and *bx> EcR.A<sup>DN</sup>* (K-  
992 K'). Primary area of expression indicated by yellow arrows. Scale bar=50um. **(L-M)**  
993 Representative images of Wg (grey) expression in control, *UAS-GFP* alone (L), and  
994 *UAS-EcR.A<sup>DN</sup>;UAS-GFP* (M), MARCM clones. Larvae were heat-shocked at 60h AED,  
995 and tissues were isolated at 104h AED. Zoom-in images of clones at the hinge (L'-L'')  
996 and margin (M'-M'') are shown on the right. Arrows indicate the region where clones  
997 cross the Wg expression at the hinge (yellow) and margin (blue). **(N)** Wg locus  
998 transcriptional activity - *UAS-EcR.A<sup>DN</sup>;UAS-GFP* clones in *wg-lacZ* background. Clones  
999 at hinge and margin are shown in N' and N'' respectively. **(O)** Ecdysone signaling  
1000 cascade for the regulation of Wg expression.

1001

1002

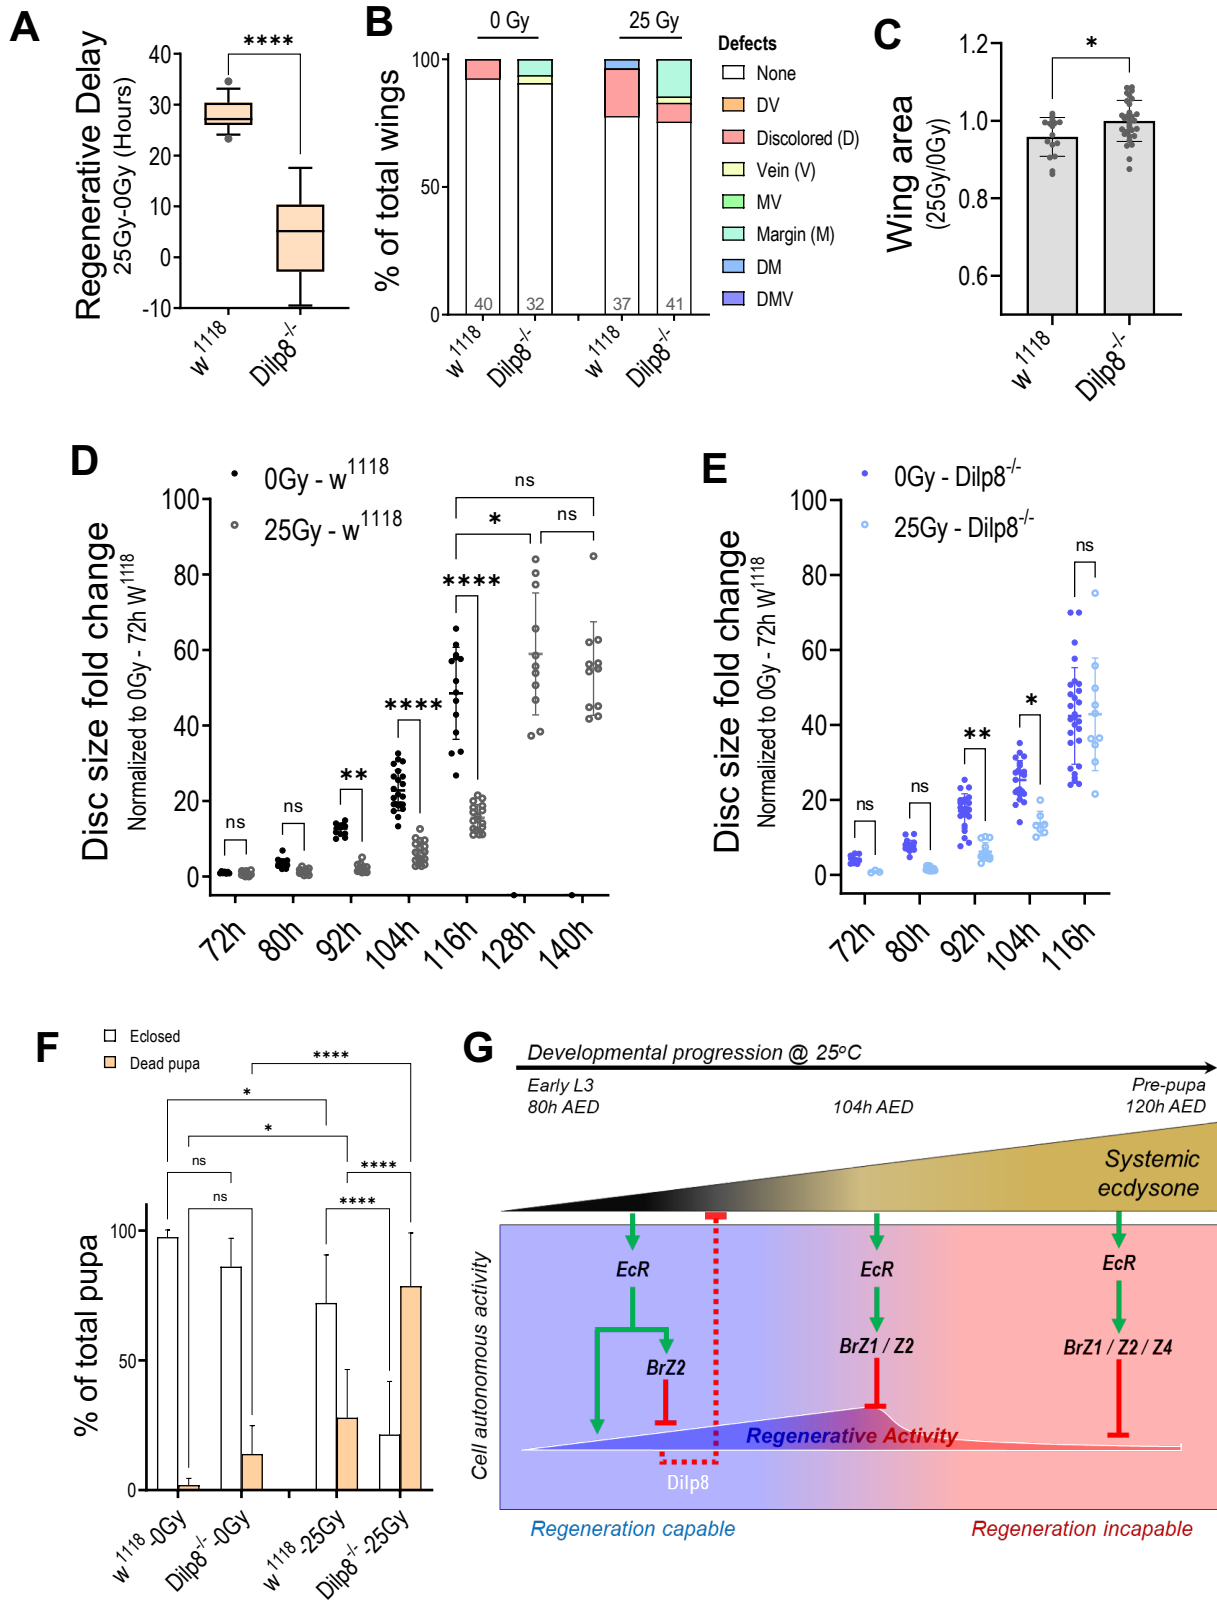



1005 **Figure 6. *Dilp8* larvae meet regeneration targets within the attenuated**  
1006 **development period. (A)** Quantification of regenerative delay following early damage  
1007 (20Gy-80h) in  $w^{1118}$  (*dilp8*<sup>+</sup>) and *dilp8*<sup>-/-</sup> larvae. Unpaired t-test, \*\*\*\*p<0.0001. **(B)** Adult  
1008 wings that show individual defects or combinations of defects increase following late  
1009 damage. The graph shows the percentage of defective adult wings following no damage  
1010 (0Gy) and early damage (25Gy-80h) in  $w^{1118}$  and *dilp8*<sup>-/-</sup> adults. Population size is  
1011 indicated in the graph. **(C)** Quantification of adult wing size for tissue in (B). Size of wing  
1012 measured in unit area and normalized to undamaged wing size of respective genotype  
1013 and sex. Unpaired t-test, \*p<0.05. **(D-E)** Quantification of wing disc growth following no  
1014 damaged tissues (0Gy) and damage (25Gy) at 48h AED in  $w^{1118}$  (D) and *dilp8*<sup>-/-</sup> (E)  
1015 larvae. Data sets normalized to 72h undamaged  $w^{1118}$  tissues. \*\*\*\*p<0.0001,  
1016 \*\*\*p<0.001, \*\*p<0.01, \*p<0.05, 2-way ANOVA with Tukey test. **(F)** Quantification of  
1017 population viability following early damage (20Gy-80h) in  $w^{1118}$  and *dilp8*<sup>-/-</sup> larvae.  
1018 \*\*\*\*p<0.0001, \*p<0.05, 2-way ANOVA with Tukey test. **(G)** The summary model  
1019 illustrates the sequence of ecdysone-regulated cell-autonomous events that regulate  
1020 regenerative activity and regenerative capacity during wing disc development.  
1021  
1022
